# Supplementary material for: Histone H2B monoubiquitination is a critical epigenetic switch for the regulation of autophagy
Source: PubMed Central journal article supplement — Nucleic Acids Res. 2016 Oct 26;45(3):1144–58. doi: 10.1093/nar/gkw1025 (PMC5388390; doi:10.1093/nar/gkw1025), 2016-10-26

## **Supplementary Materials and Methods**

### **Differential preparation of the cytoplasmic and nuclear proteins**

The cytoplasmic and nuclear proteins of the 293T cells were prepared using a Cytoplasmic and Nuclear Protein Extraction Kit purchased from Beyotime Biotechnology (#P0027). The preparation of the different fractions was performed according to the manufacturer's protocol.

### **Oncomine bioinformatic analysis**

To assess the gene expression changes in cancers and in normal tissues, an oncomine bioinformatic analysis was employed using the Oncomine online services ([www.oncomine.org](http://www.oncomine.org)).

## Supplementary Figure Legends

### Figure S1. The repeated experiments of Figure 1I.

293T cells were transfected with a control or a USP44 plasmid for 48 h. The cells were then lysed and subjected to western blot analysis using the indicated antibodies. The p62 protein levels were semi-quantified and the data were shown in the right (n=5).

### Figure S2. The H2B monoubiquitination levels are decreased during starvation-induced autophagy activation.

(A) HeLa cells were starved by treating with HBSS for the indicated time periods. Cell extracts were then prepared and subjected to western blot analysis using the indicated antibodies.

(B) Control or HBSS-treated (starvation) HeLa cells were lysed and subjected to western blot and RT-PCR analyses using specific antibodies or primers, as indicated.

(C) Control or HBSS-treated (starvation) HEK293T cells were lysed and subjected to western blot analyses using specific antibodies (left) or realtime RT-PCR analyses by using specific primers (right) (two-tailed unpaired *t* test, n=3), as indicated. Three biological replicates were analyzed.

(D) Cell extracts from HEK293T cells treated with or without starvation for the indicated time periods were prepared and subjected to Co-IP analysis using an anti-RNF20 antibody, followed by western blot assays using the indicated antibodies.

(E) Cytoplasmic and nuclear extracts from HEK293T cells treated with or without starvation for different time periods were separately prepared. The lysates were then subjected to western blot assays using the indicated antibodies.

(F) HEK293T and HeLa cells were transfected with a control or an ATG5- or ATG7-specific siRNA, and the total proteins were prepared. A western blot analysis was performed using specific antibodies, as indicated.

(G) Control or ATG5 RNAi or ATG7 RNAi HEK293T and HeLa cells were treated with or without starvation for 10 h. The cell extracts were then lysed and subjected to western blot assays using the indicated antibodies.

(H) HeLa cells treated with starvation or 2  $\mu$ M rapamycin for 10 h. The cells were then lysed and subjected to western blot assays using the indicated antibodies.

### Figure S3. The effect of Rapamycin treatment on the levels of H2Bub1.

H1299, SMMC, HeLa and HEK293T cells were treated with rapamycin for a time course or dose course analysis as indicated. The cells were harvested and subjected to western blot analyses with specific antibodies as indicated.

**Figure S4. The expression correlation between DNMT3a and DNMT3b and USP44 in cancer and normal tissues.**

The bioinformatic analyses for the gene expression changes between the normal and cancer tissues were performed using the OncoPrint online services ([www.oncoPrint.org](http://www.oncoPrint.org)).

**Figure S5. The RNAi efficiency assay of USP44 RNAi in HEK293T cells.**

(A) HEK293T cells were transfected with a control or USP44-specific siRNAs for 48 h. The total RNA was then prepared and subjected to an RT-PCR assay using specific primers for USP44 to determine the interference efficiency of the USP44 siRNAs.

(B) HEK293T cells were transfected with a control or USP44-specific siRNAs for 48 h. The cells were then treated with or without HBSS (starvation) for the indicated time periods. Cell extracts were prepared and subjected to western blot analysis using the indicated antibodies.

## Supplementary Tables

**Table S1. Primer Sequences**

### Real-Time RT-PCR primers

| Gene Name          | Primers                                             |
|--------------------|-----------------------------------------------------|
| p62/SQSTM1 (human) | F: CTCACCGTGAAGGCCTACCT<br>R: CGTCCTCATCGCGGTAGTG   |
| USP44 (human)      | F: GGGCACTACACTGCCTACTG<br>R: CAGGAGCTCTGGAGGCAAAA  |
| DNMT3a (human)     | F: CCTGTGGGAGCCTCAATGTT<br>R: CCACACACTCCACGCAAAAG  |
| DNMT3b (human)     | F: GCCATGTACCATGCTCTGGA<br>R: CACGACGCACCTTCGACTTA  |
| ZBTB42 (human)     | F: ACTCGGGTGAGAAGCCCTAT<br>R: CAGTGAAACTTGCGGACGTG  |
| NTN4 (human)       | F: CTGCTGCTGCTCTGGGG<br>R: CCGACAAGTCAGATCCGTGT     |
| PTGER2 (human)     | F: GCTGGGGAACCTCATAGCAC<br>R: CGTACGAAGCCAGTACCACT  |
| TRIM32 (human)     | F: TCCTGGCCAAGATCAAGCAG<br>R: TTCCACGTAACTGTCCGGG   |
| TACC2 (human)      | F: TGATGGCGTTGTCTGTGTTTC<br>R: AGTTGTAAGTCCCCTGCTGG |
| MBP (human)        | F: CCGGCAAGAACTGCTCACTA<br>R: CCCCCAGCTAAATCTGCTCA  |
| TRAF3IP2 (human)   | F: ATCTCAGCTTTCAGCGGCTT<br>R: TCCTGGGGCTGGGAATCATA  |
| GPR161 (human)     | F: ATGCTGGTGTGCTATGGCTT<br>R: CATTCTCCTGCTGCCTGAA   |
| WFDC1 (human)      | F: ATGAGTGCCACATCCTGAGC<br>R: GCTTCTGTTGTCCCCTTCCA  |
| CXCL12 (human)     | F: TGAGCTACAGATGCCCATGC<br>R: TAGCTTCGGGTCAATGCACA  |
| EPHA6 (human)      | F: GACCCTCGTGCCCTGTTC<br>R: AGAAATTCCCGGACTTCGCA    |
| TPR (human)        | F: TGATGCTTCGGAACATGCCT<br>R: GGTGGAGGGGAGATCTGACT  |
| TNFAIP3 (human)    | F: CTTGTGGCGCTGAAAACGAA<br>R: GCAAAGCCCCGTTTCAACAA  |
| PLAGL1 (human)     | F: AAGTAGCTTGCCAGCTGAGG<br>R: GGCTTGCAAGTGGGGAGTAT  |
| SLC25A13 (human)   | F: GCAGAAGGCCTCAGGTGATT<br>R: AGAGCCAGTTGATCGTTGGT  |

|                 |                                                       |
|-----------------|-------------------------------------------------------|
| CENPK (human)   | F: CGCTGAACTCAGTCAATGGC<br>R: ATCCAACCACCGTTGTTCCC    |
| USP36 (human)   | F: CATCGACGCCATGCAGAAAG<br>R: AGTAGGGGTCGTAGGTGTCC    |
| GABBR2 (human)  | F: CCATCGAGCAGATCCGCAA<br>R: AGACGCCTCCAAACACCATC     |
| ZBTB10 (human)  | F: AAGGAGTTGATGCAGGACGG<br>R: GGGAAAGTGCTGGACAGTCTC   |
| NFKBIZ (human)  | F: CCGCTCAACCTGAGCTACTT<br>R: ATATGGGGCTCAACTGGCTG    |
| C5orf41 (human) | F: TTCAAGGTCATGCCACTCCC<br>R: TGGCTGTTACCCAAGTTGT     |
| USP44 (mouse)   | F: CTTACTCGACGGCACCCAAT<br>R: TCTTCGCCTCTCGTTTTGCT    |
| USP7 (human)    | F: CATGGAGATGGAAGCGGGAG<br>R: TCACTCAGTCTGCTGAAGCG    |
| USP12 (human)   | F: CAGCAAACAGGAAGCACACA<br>R: ATTGGGACCACTTCCACAGT    |
| USP22 (human)   | F: TGGACAACTGGAAGCAGAACC<br>R: ACAGCCGAAGAAGACACAGTAG |
| USP46 (human)   | F: CTGTCCGAAACATCGCCTCC<br>R: GTACAATGCCTGAAGCACGG    |
| USP49 (human)   | F: TGGGGTCCATGTCTGCTTTG<br>R: TGCAGTGGACCCAAAAACCT    |

#### Semi-quantitative RT-PCR primers (Figure S1B and S3A)

| Gene Name     | Primers                                           |
|---------------|---------------------------------------------------|
| USP44 (human) | F: CTTGCCTTAGCTGCTCCCAT<br>R: GACTGAGCGAGCCCTTGTA |

#### ChIP-PCR primers

| Gene Name      | Primers                                                    |
|----------------|------------------------------------------------------------|
| USP44 (human)  | F: GTTTGAGGAGAAAGTGAATTTT<br>R: TAAAAATCAACTTCCTAAAACCA    |
| USP44 (mouse)  | F: TAAAGAATTGGCCCGGTCTGT<br>R: AAAACTTCCTCTCAGGGCGG        |
| ZBTB42 (human) | F: GGTTTACCCTCGGGTGACTG<br>R: TCTCTCGCGATACTTGGCG          |
| NTN4 (human)   | F: AAATCCATCTGAGTTAGCTTCCA<br>R: ATTTCTTAACTCTTTCAGTGATGCT |
| PTGER2 (human) | F: AGTTGCTTTGCTTTGCTCGTT<br>R: CGTGTTGCCGGTGTACTGA         |
| TRIM32 (human) | F: GCACCAAGGAGACGGAAACT<br>R: CAGAGCTCCCTGTCCGTCAC         |

|                  |                                                      |
|------------------|------------------------------------------------------|
| TACC2 (human)    | F: GAGGAGAGGGCTGGAAAATGA<br>R: GGTGCCTAGCACAGTAGATGA |
| MBP (human)      | F: CCAAGACTCCTGGGTTCACAT<br>R: AGAGGGTCGATGGCTACTGAA |
| TRAF3IP2 (human) | F: CTGAGCACTGAGCTGAGAAA<br>R: GAGGGGTGGGTTTGTGGAAT   |
| GPR161 (human)   | F: ATTATTGGGCCACTGAGGCA<br>R: GGAGCGTCAGCTTCCAGTTT   |
| WFDC1 (human)    | F: TGGAGAGTGGAGAGTGACAGG<br>R: GGTCCCTCGGATCATGTGT   |
| CXCL12 (human)   | F: CCTTTGACCTTCTCAGGCTCC<br>R: AGTTCCCGCCATCGAAAGG   |
| EPHA6 (human)    | F: TGCGAAGTCCGGGAATTTCTT<br>R: CCAGTACCCTGGTTCTCCAAG |
| TPR (human)      | F: TCTTACAGGCAAGTCACAA<br>R: TGTTGAATGAATAGATGCAGC   |
| TNFAIP3 (human)  | F: CTGGATGCTTGGTGAGCAGA<br>R: TCCATTGTTCCCTGCCAGCTC  |
| PLAGL1 (human)   | F: GCAGCCGTCATTTTGGATGT<br>R: ACGAGACTGGGACTATGGCT   |
| SLC25A13 (human) | F: TTCATGCGCCTCTGACCATT<br>R: AATGCATGTTGCCCTGTTGC   |
| CENPK (human)    | F: GCAAATCCTTAGTCACACCC<br>R: CCTCAATCCCTGTTCTTTGGCT |
| USP36 (human)    | F: CAGTCGCTGAACAAATCTCCG<br>R: TGTGGCTCCCAATCTCTACC  |
| GABBR2 (human)   | F: CTTTCAGAGGAGCGCAGGAA<br>R: TAGGCTGGGCCGGTAAATCA   |
| ZBTB10 (human)   | F: AAGTTCACTTCCTTGGGCACC<br>R: AGGACAAACAGCTGGCGAGT  |
| NFKBIZ (human)   | F: ATGCTGTCACGTA CT TGGGT<br>R: TGCCCCAAAGCAAGTATGGC |
| C5orf41 (human)  | F: AGTCACGCGATTTCCGGG<br>R: GTTCCGAGCAGCGGGTG        |

# Figure S1

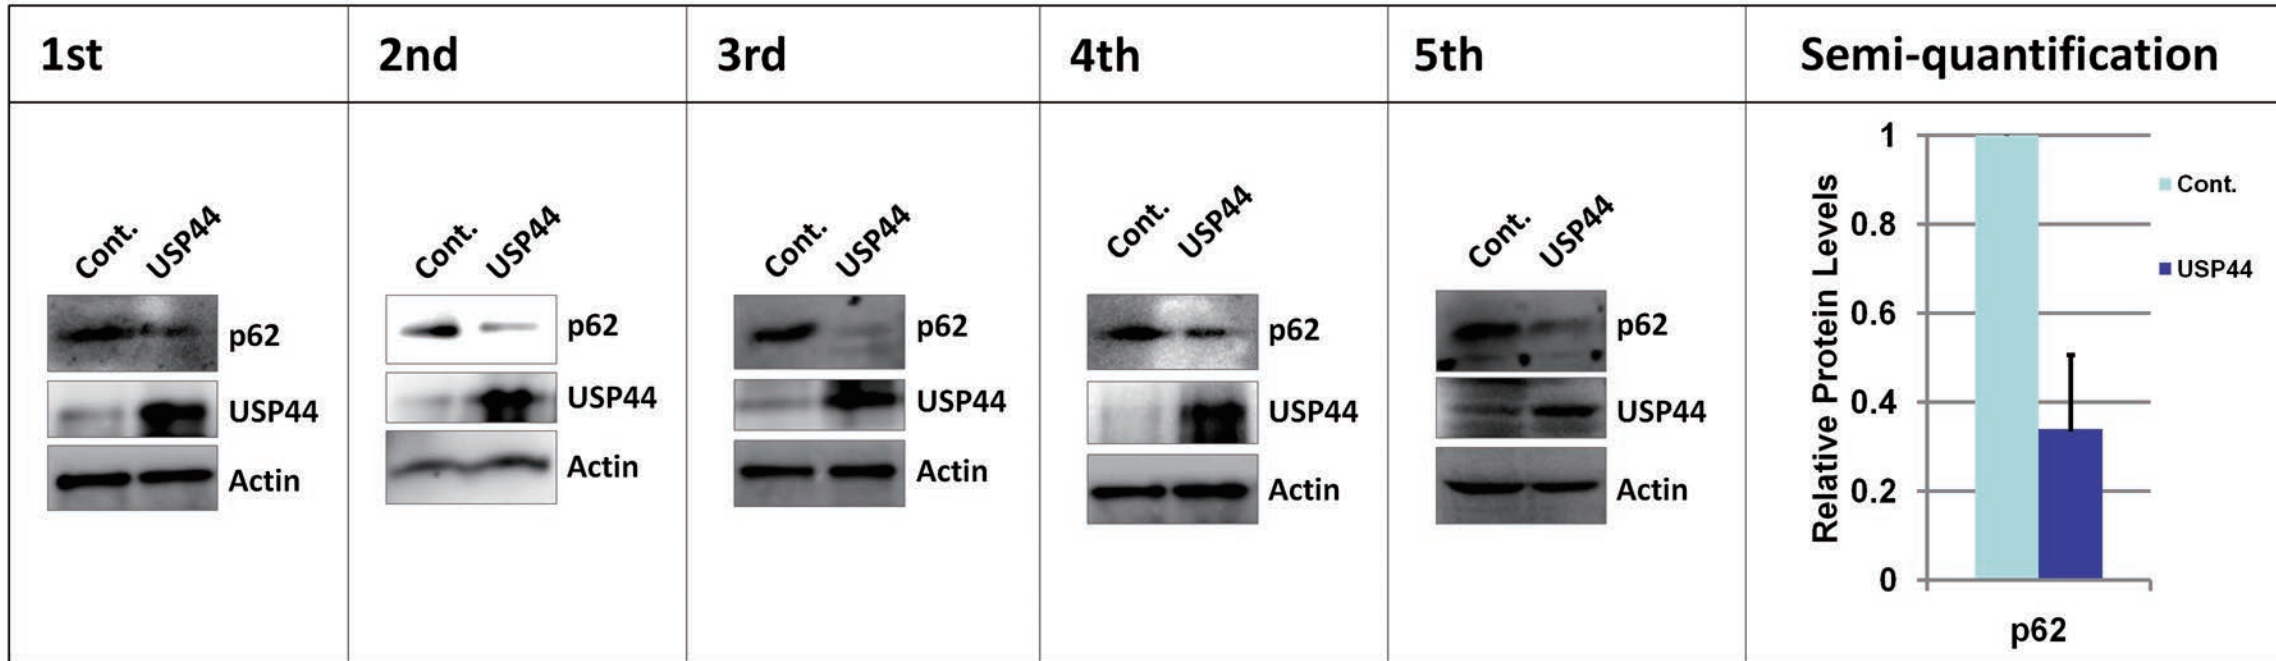

**Figure S2****A**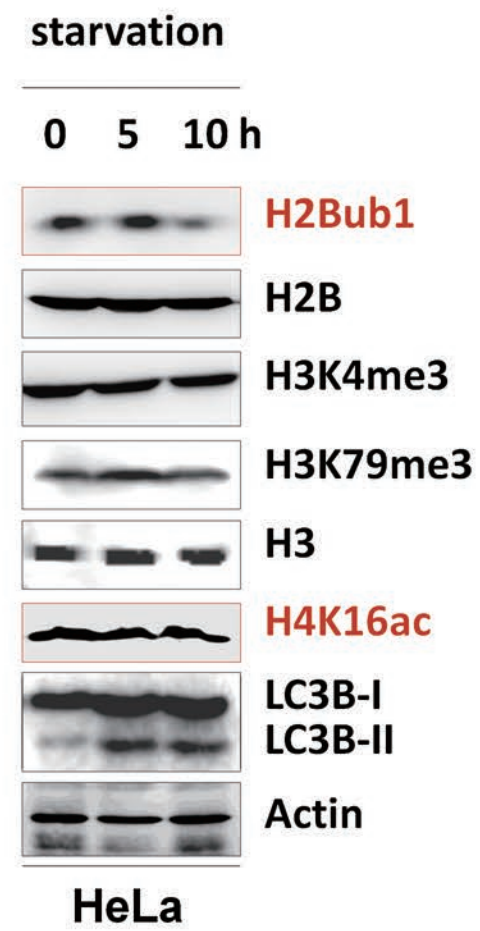**B**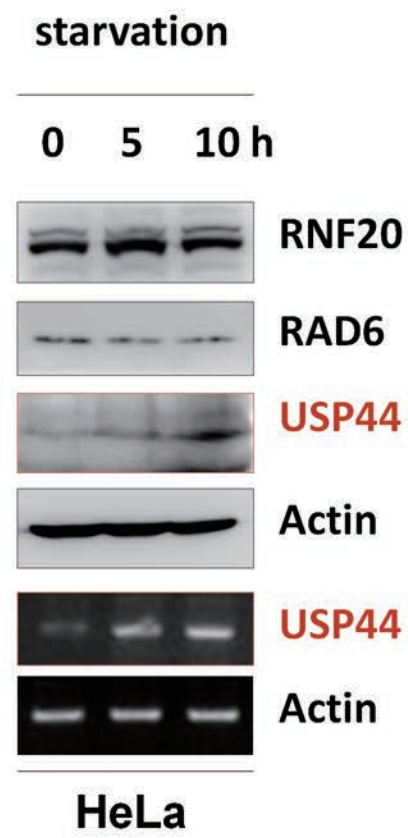**C**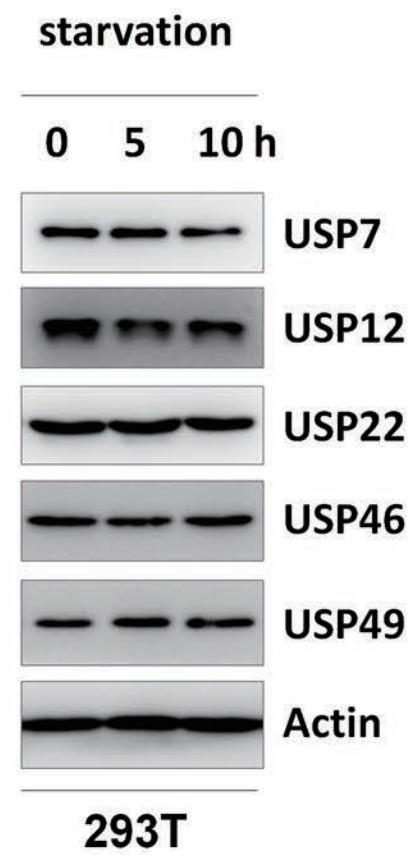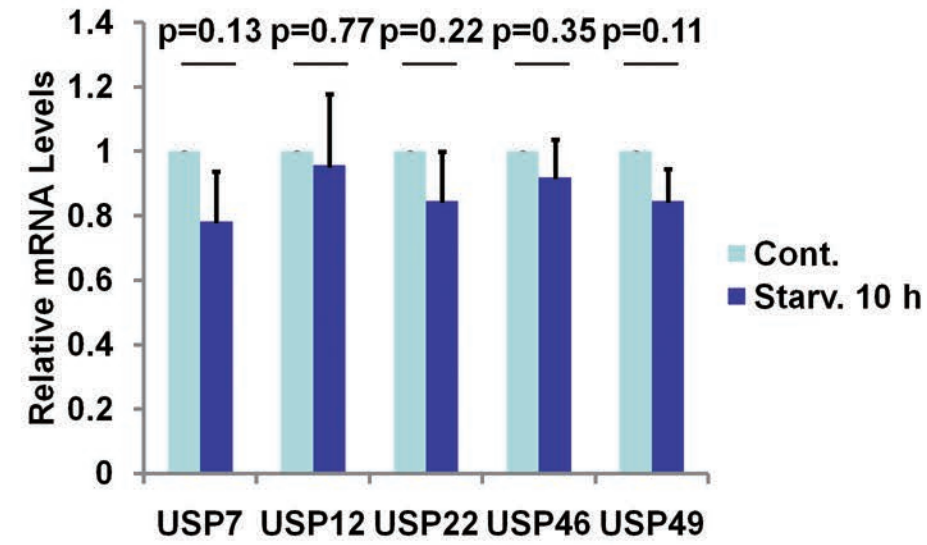**D**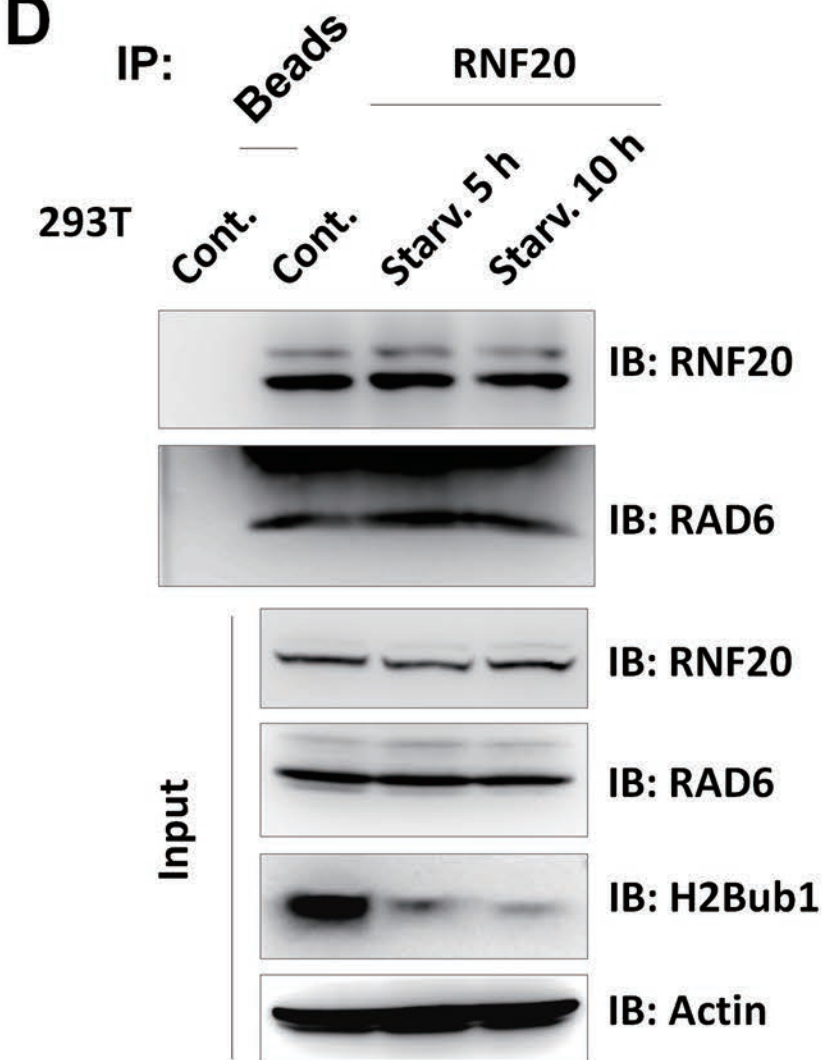**E**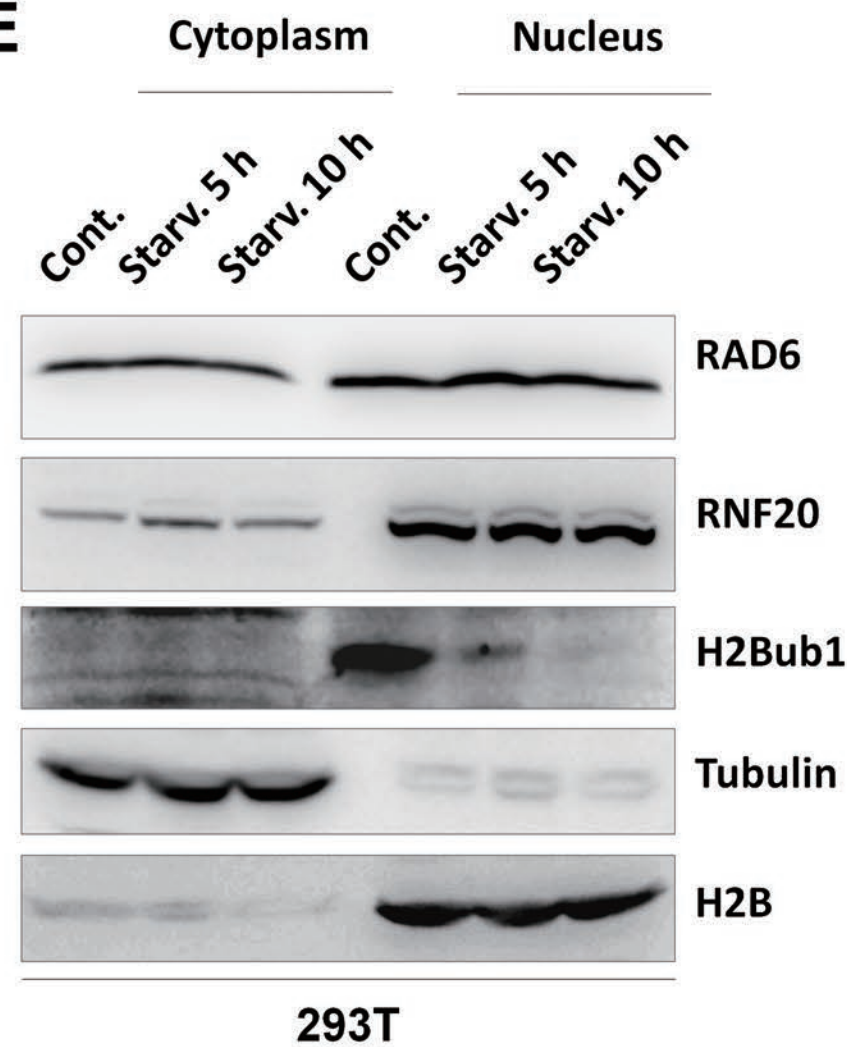**F**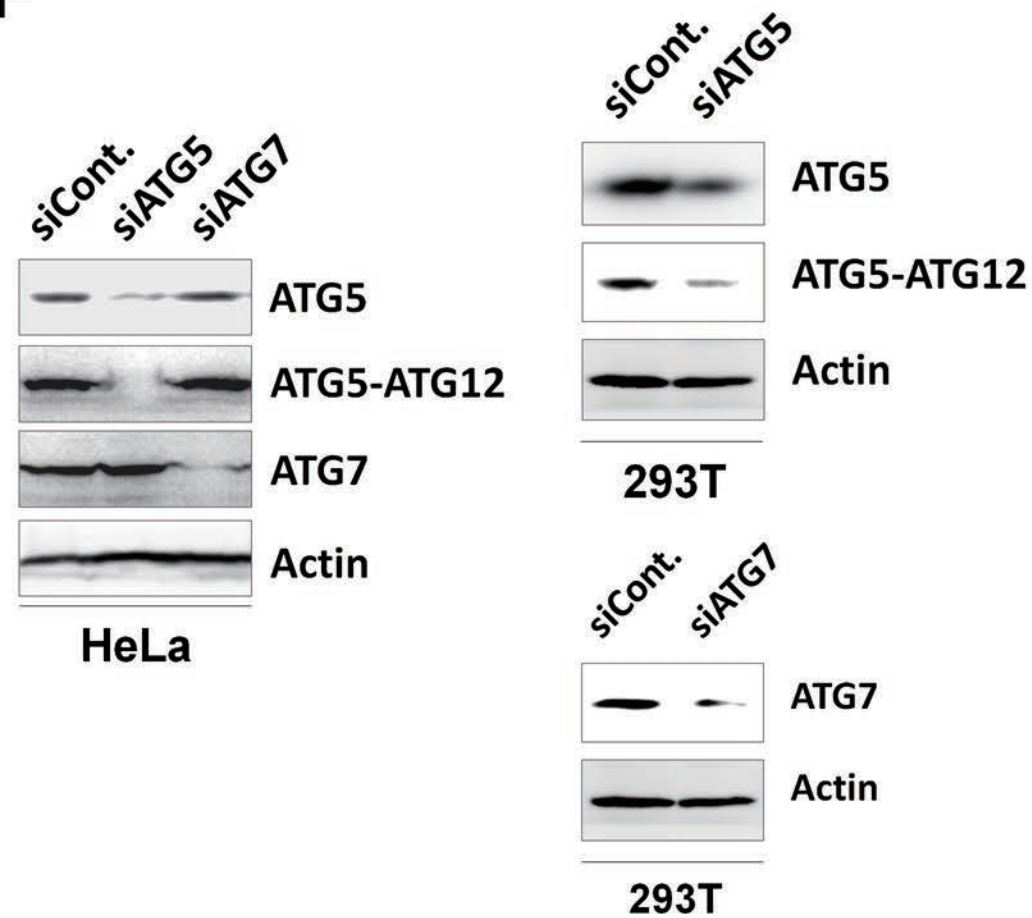**G**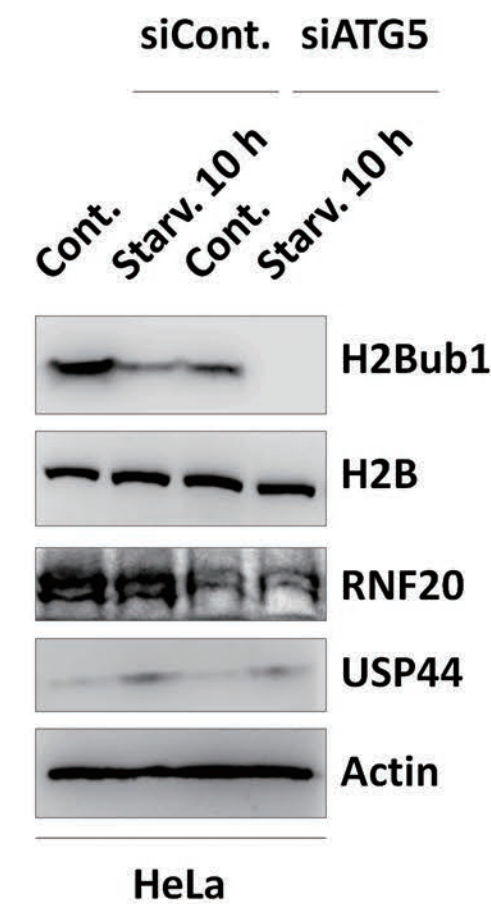**H**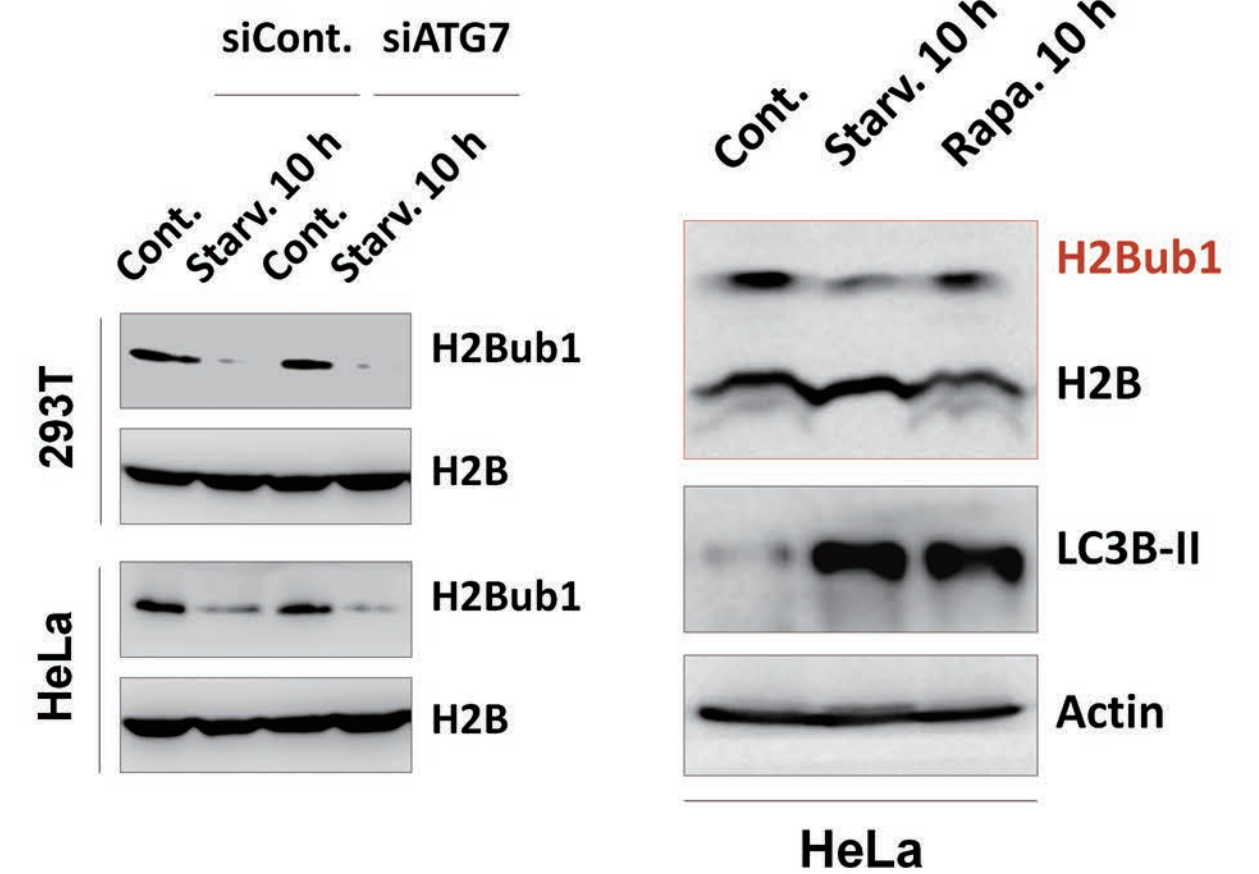



**Figure S3**

**H1299 Cells**

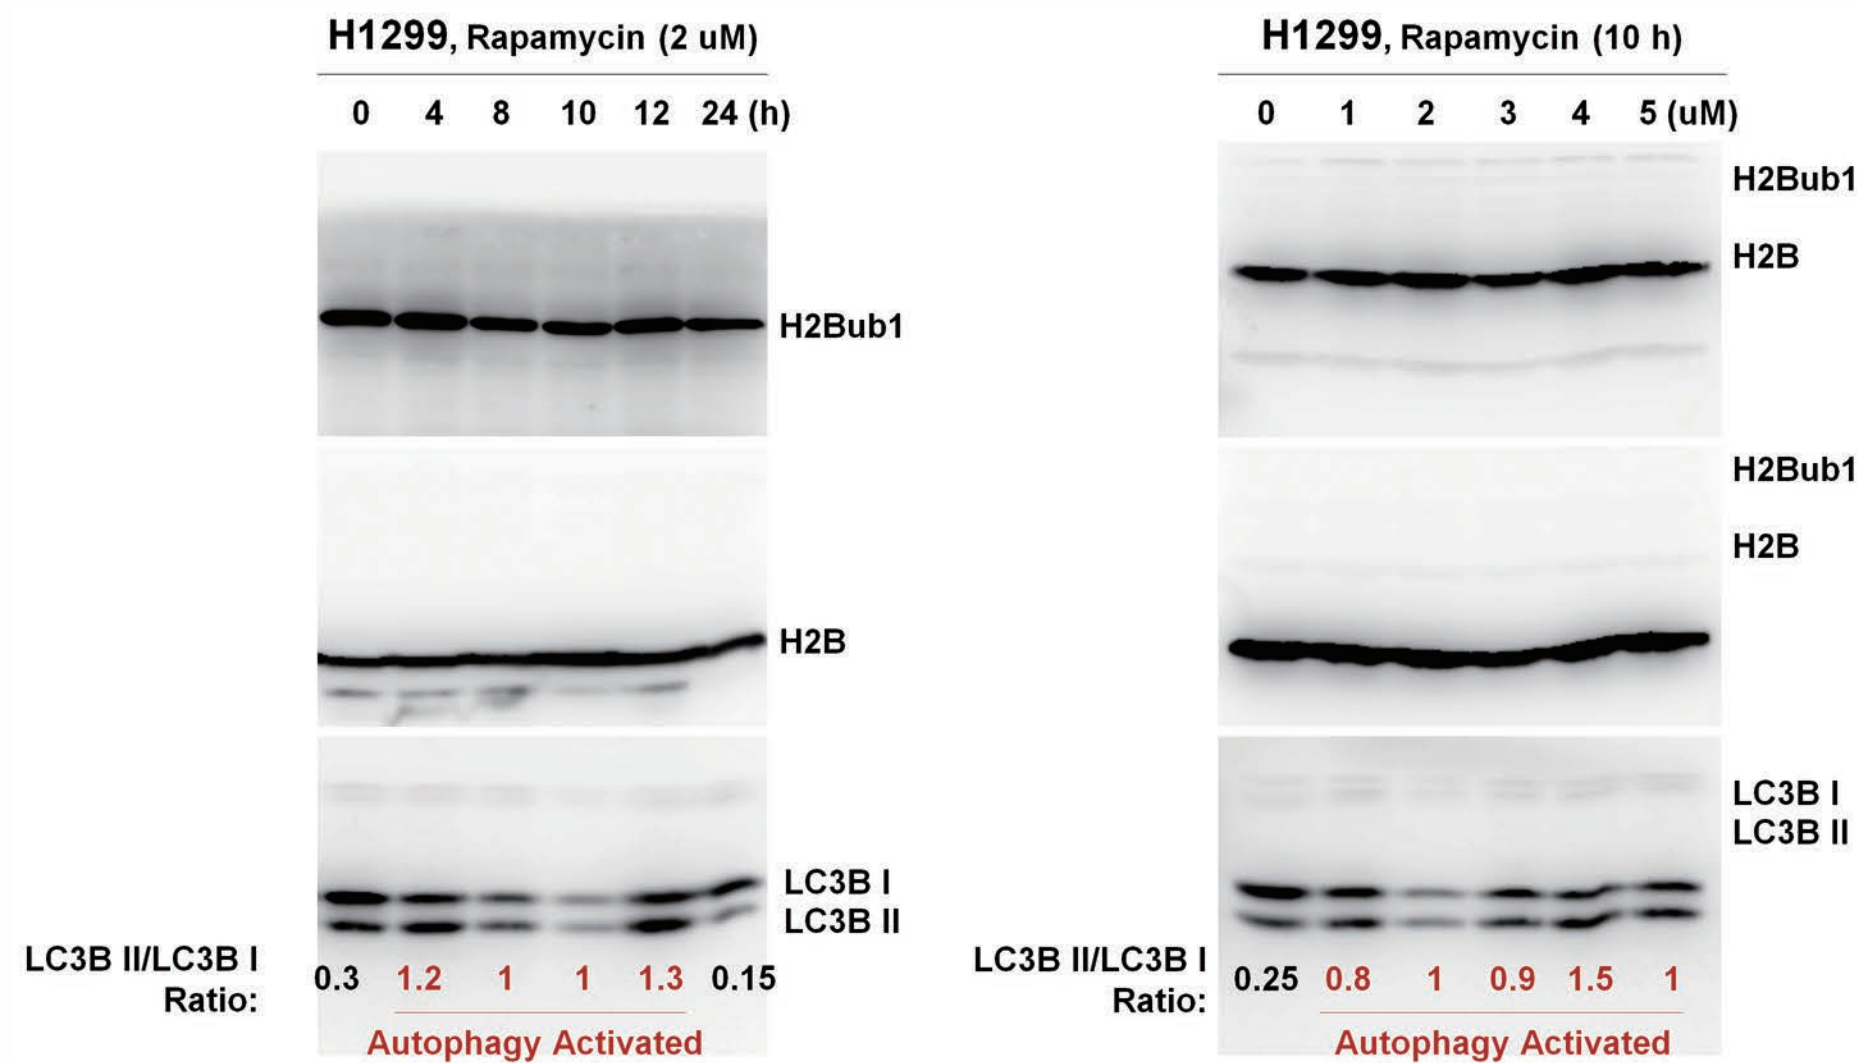

**293T Cells 1st**

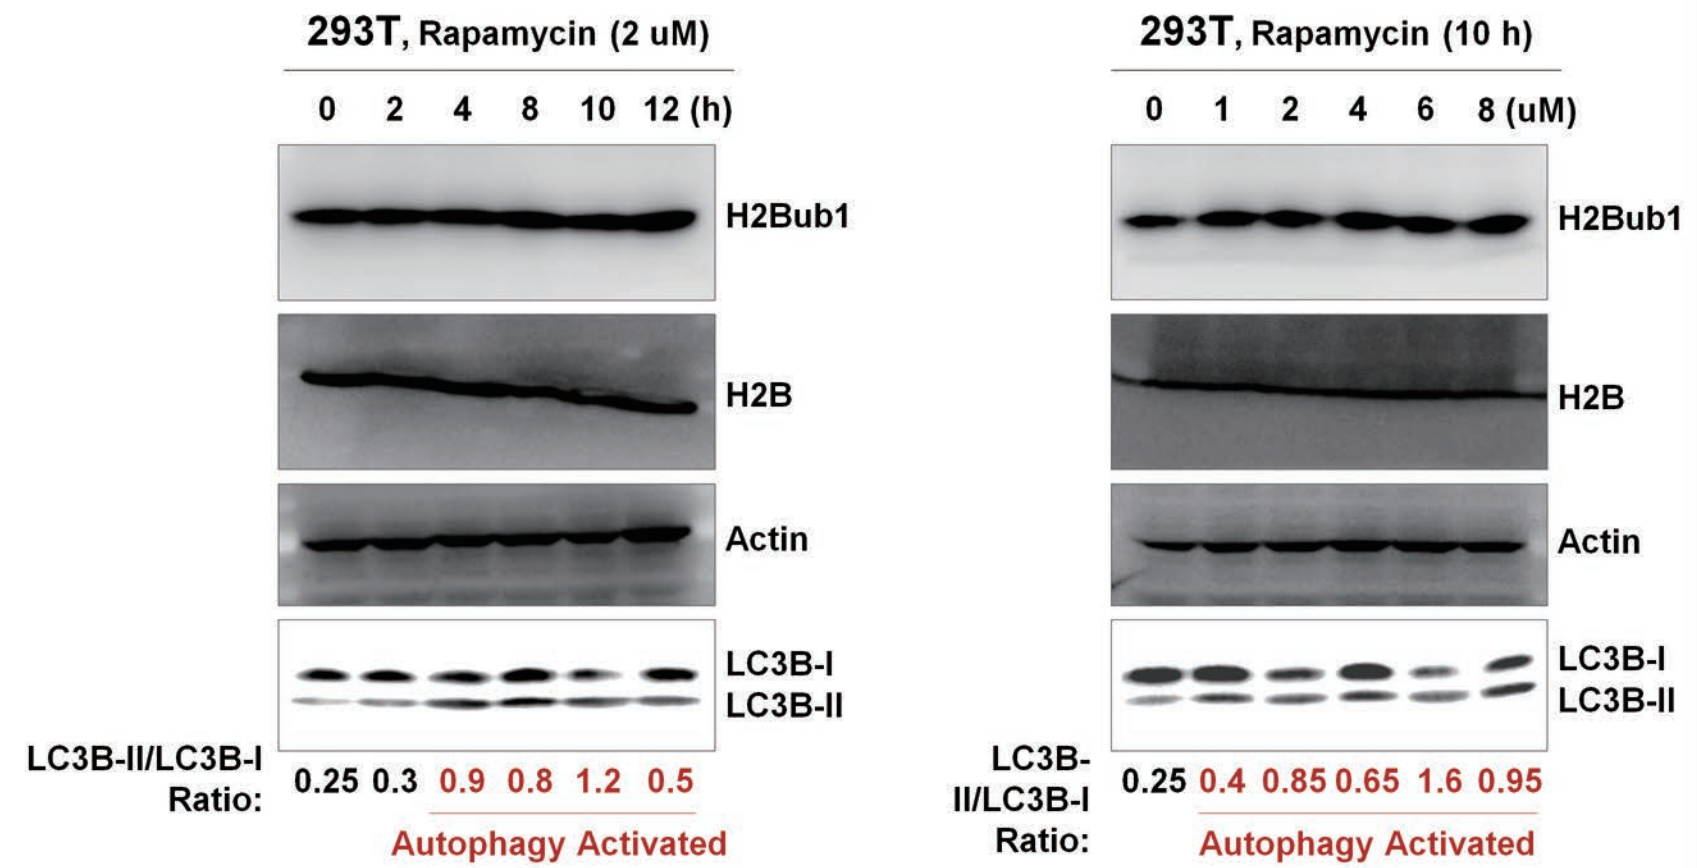

**SMMC Cells**

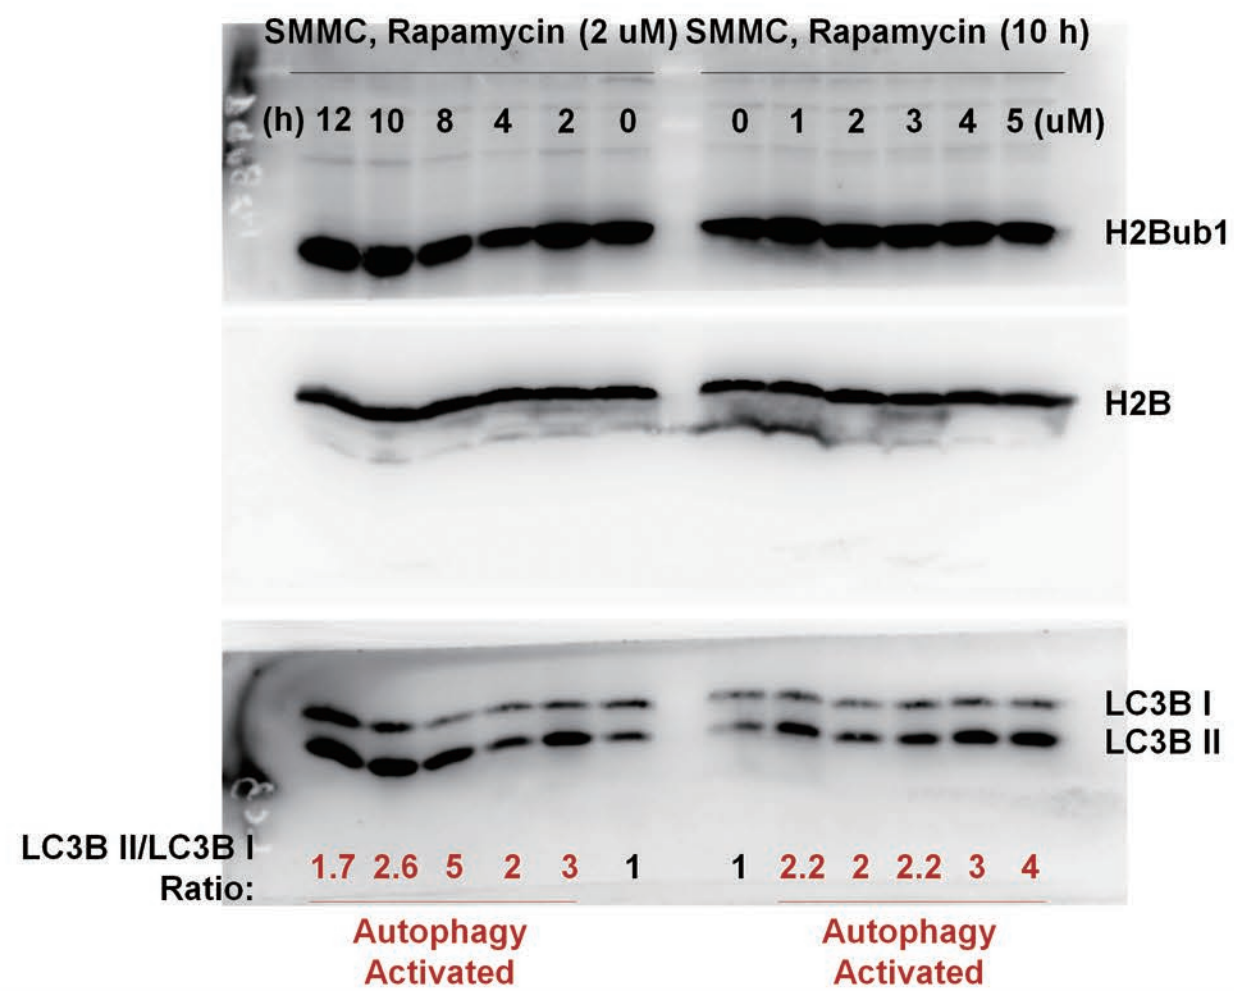

**HeLa Cells**

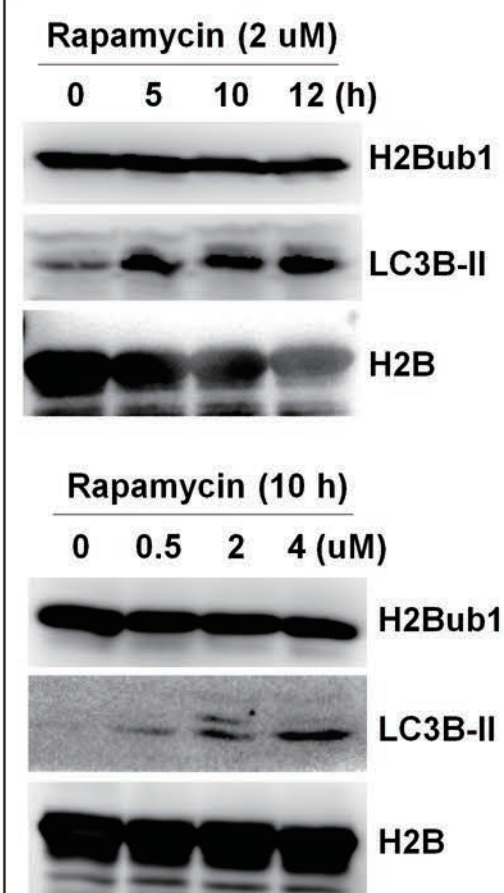

**293T Cells 2nd**

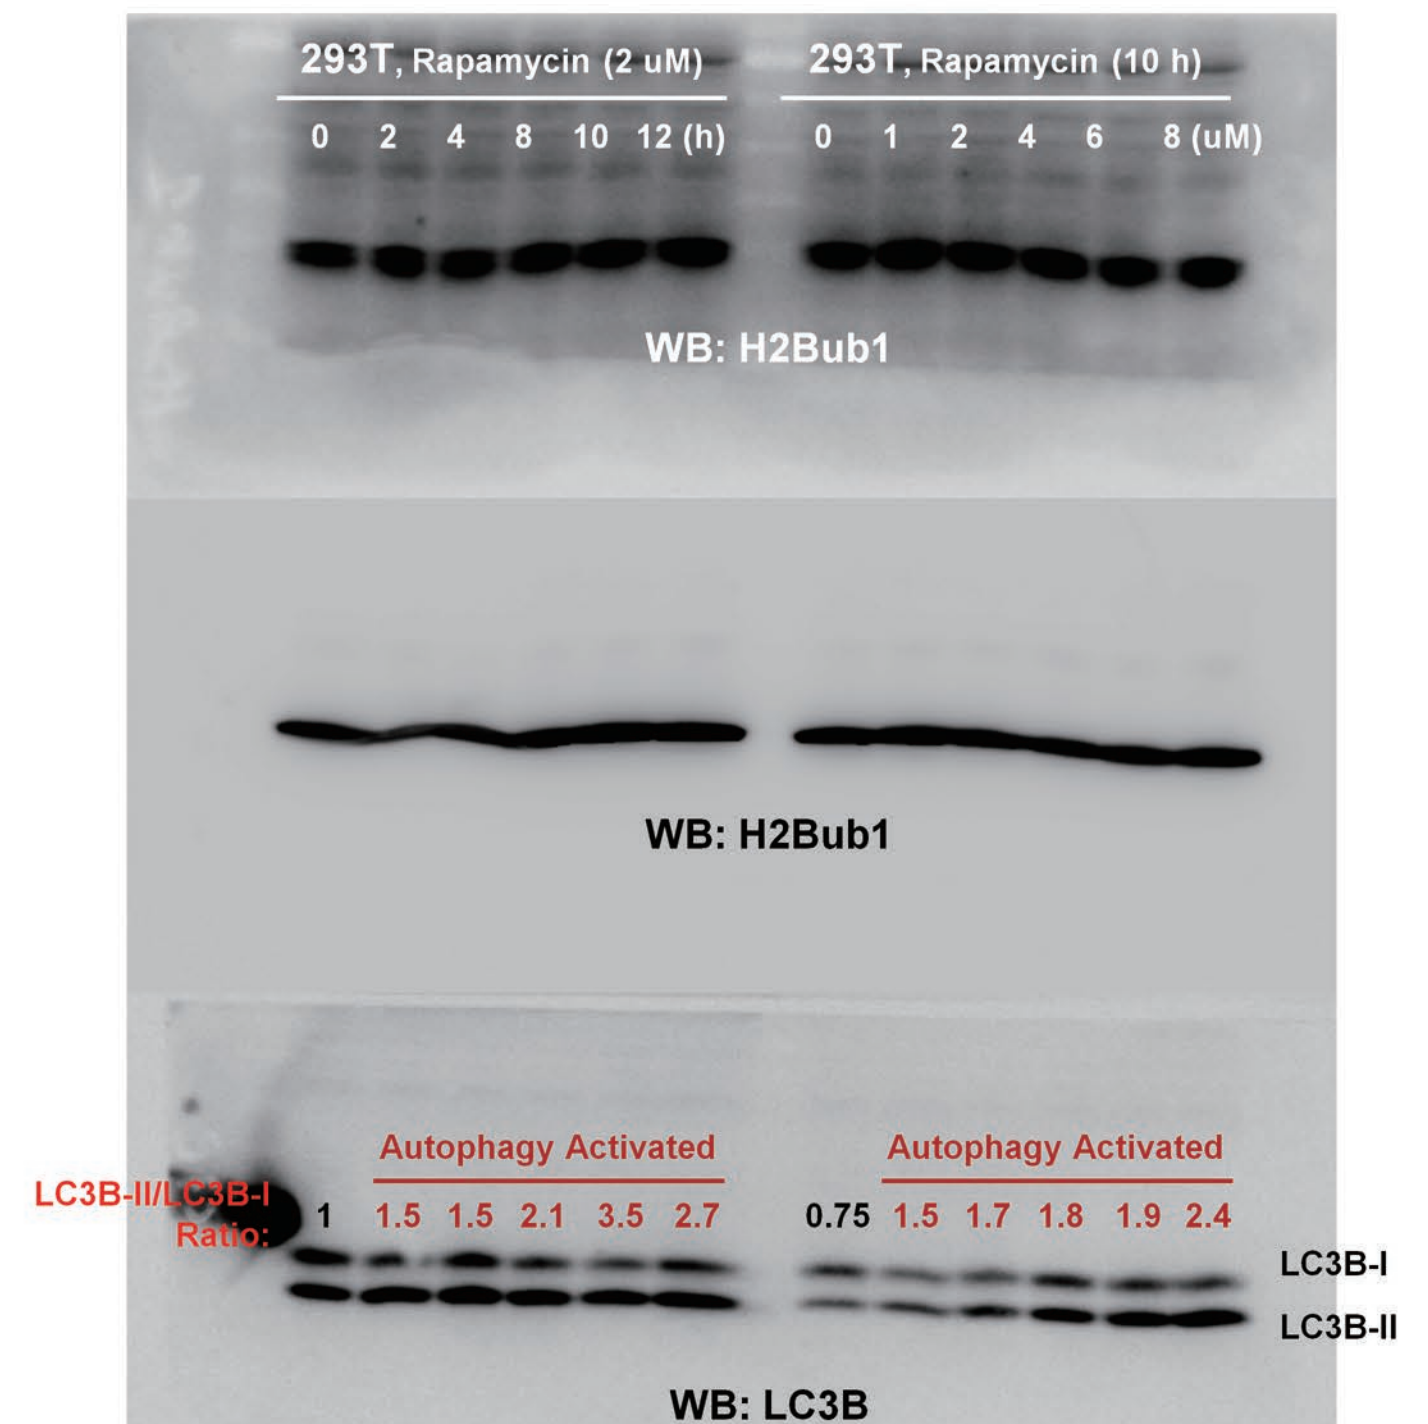

# Figure S4

**Breast**  
Finak et al

Breast   
Invasive Breast Carcinoma 

**DNMT3a**

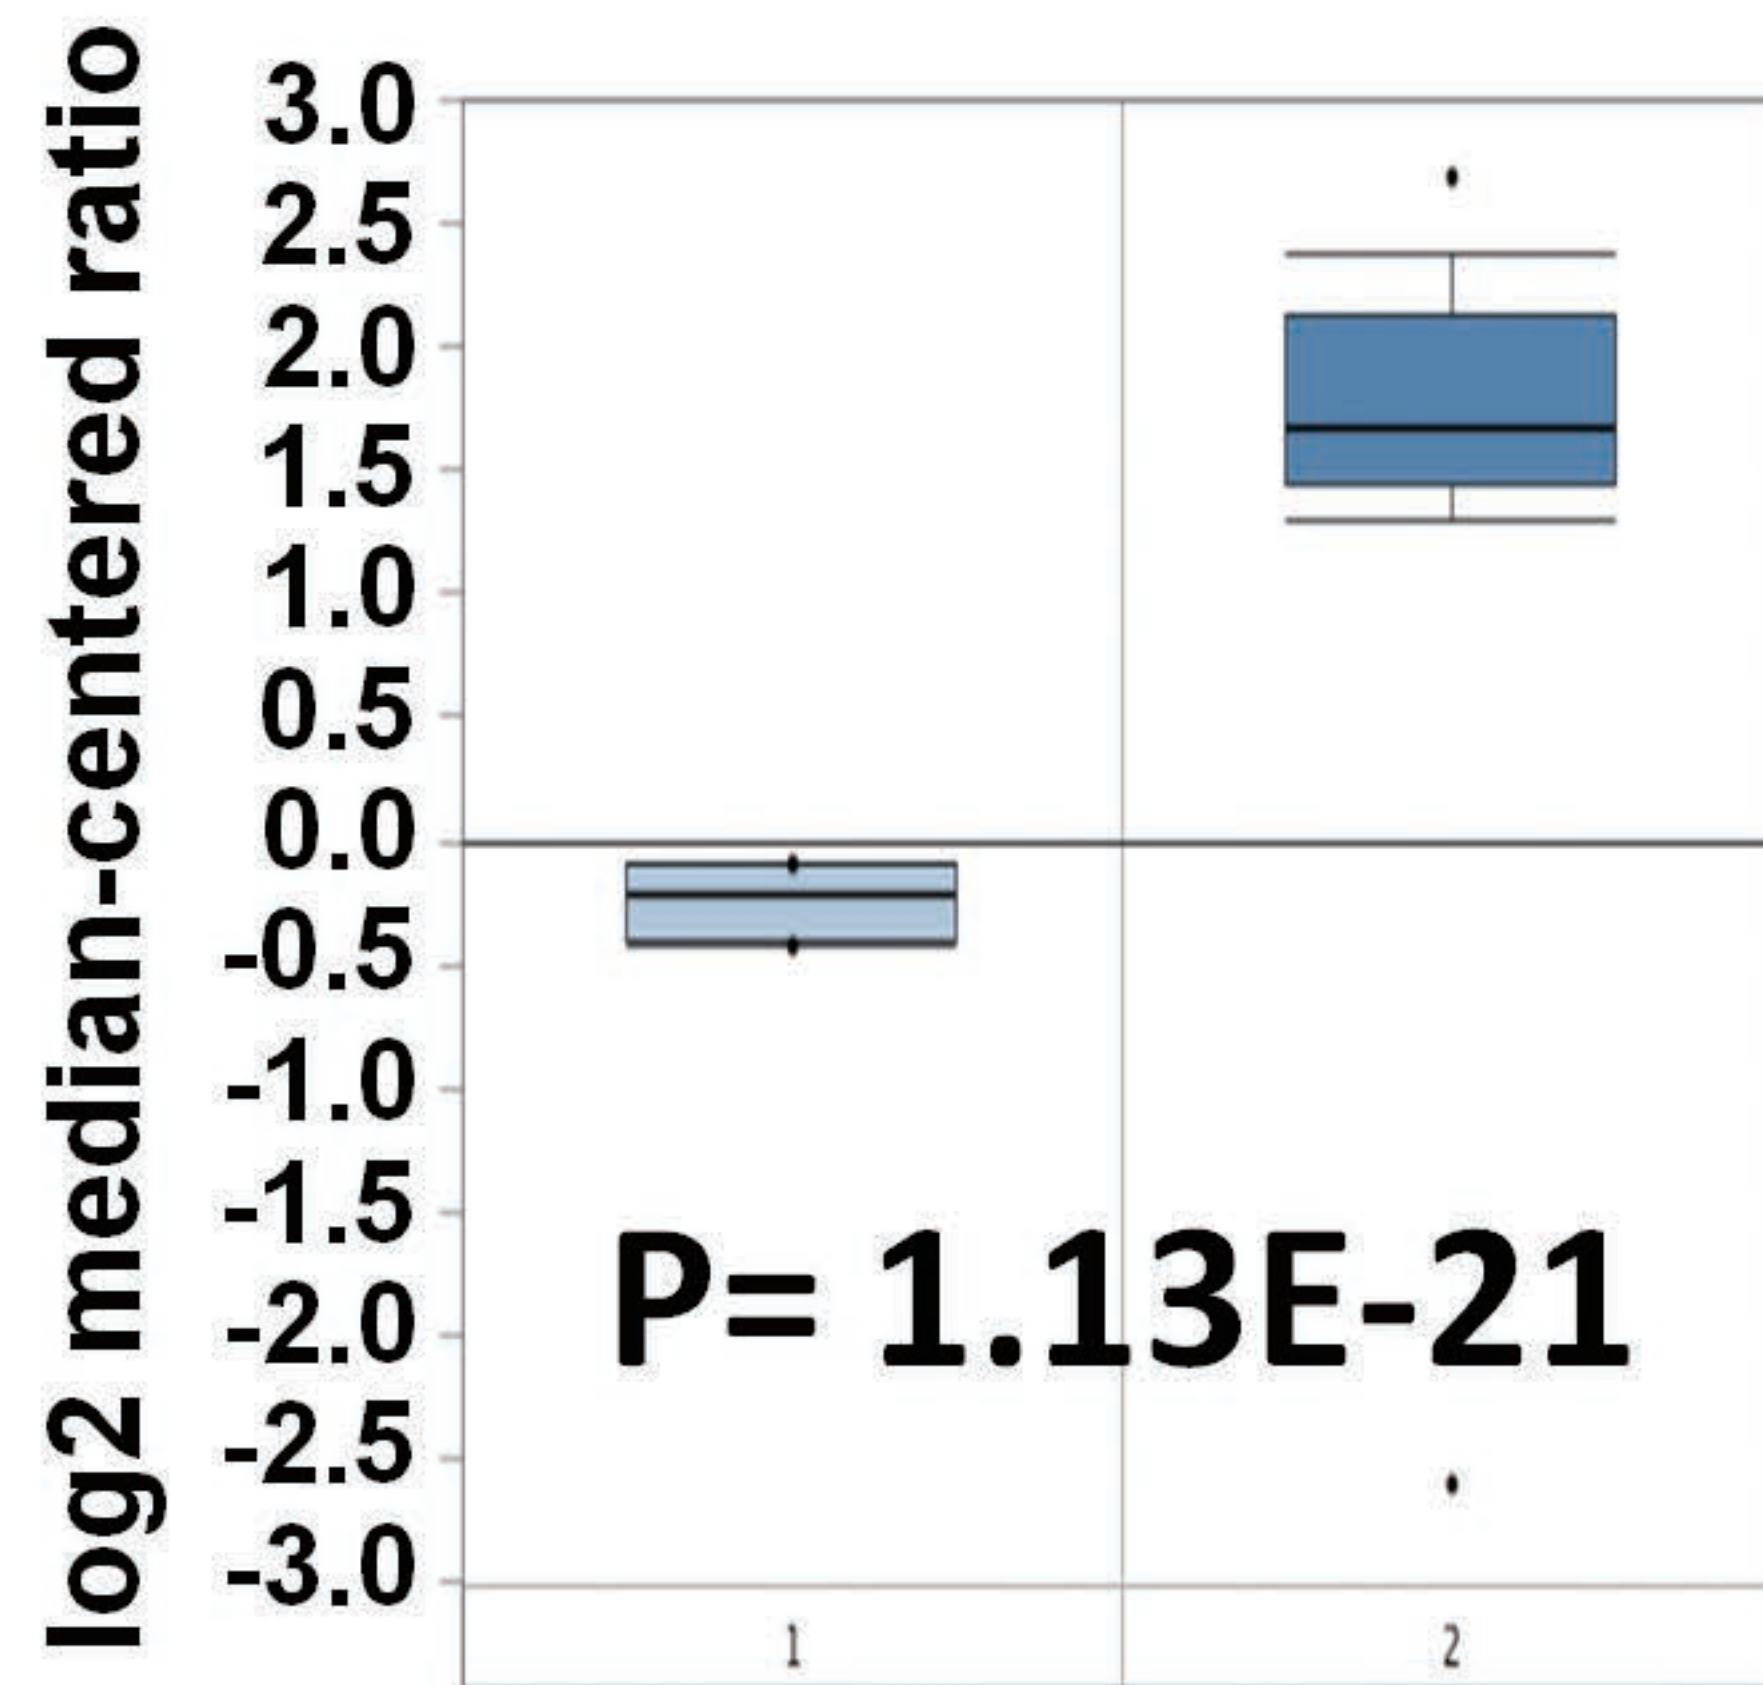

**DNMT3b**

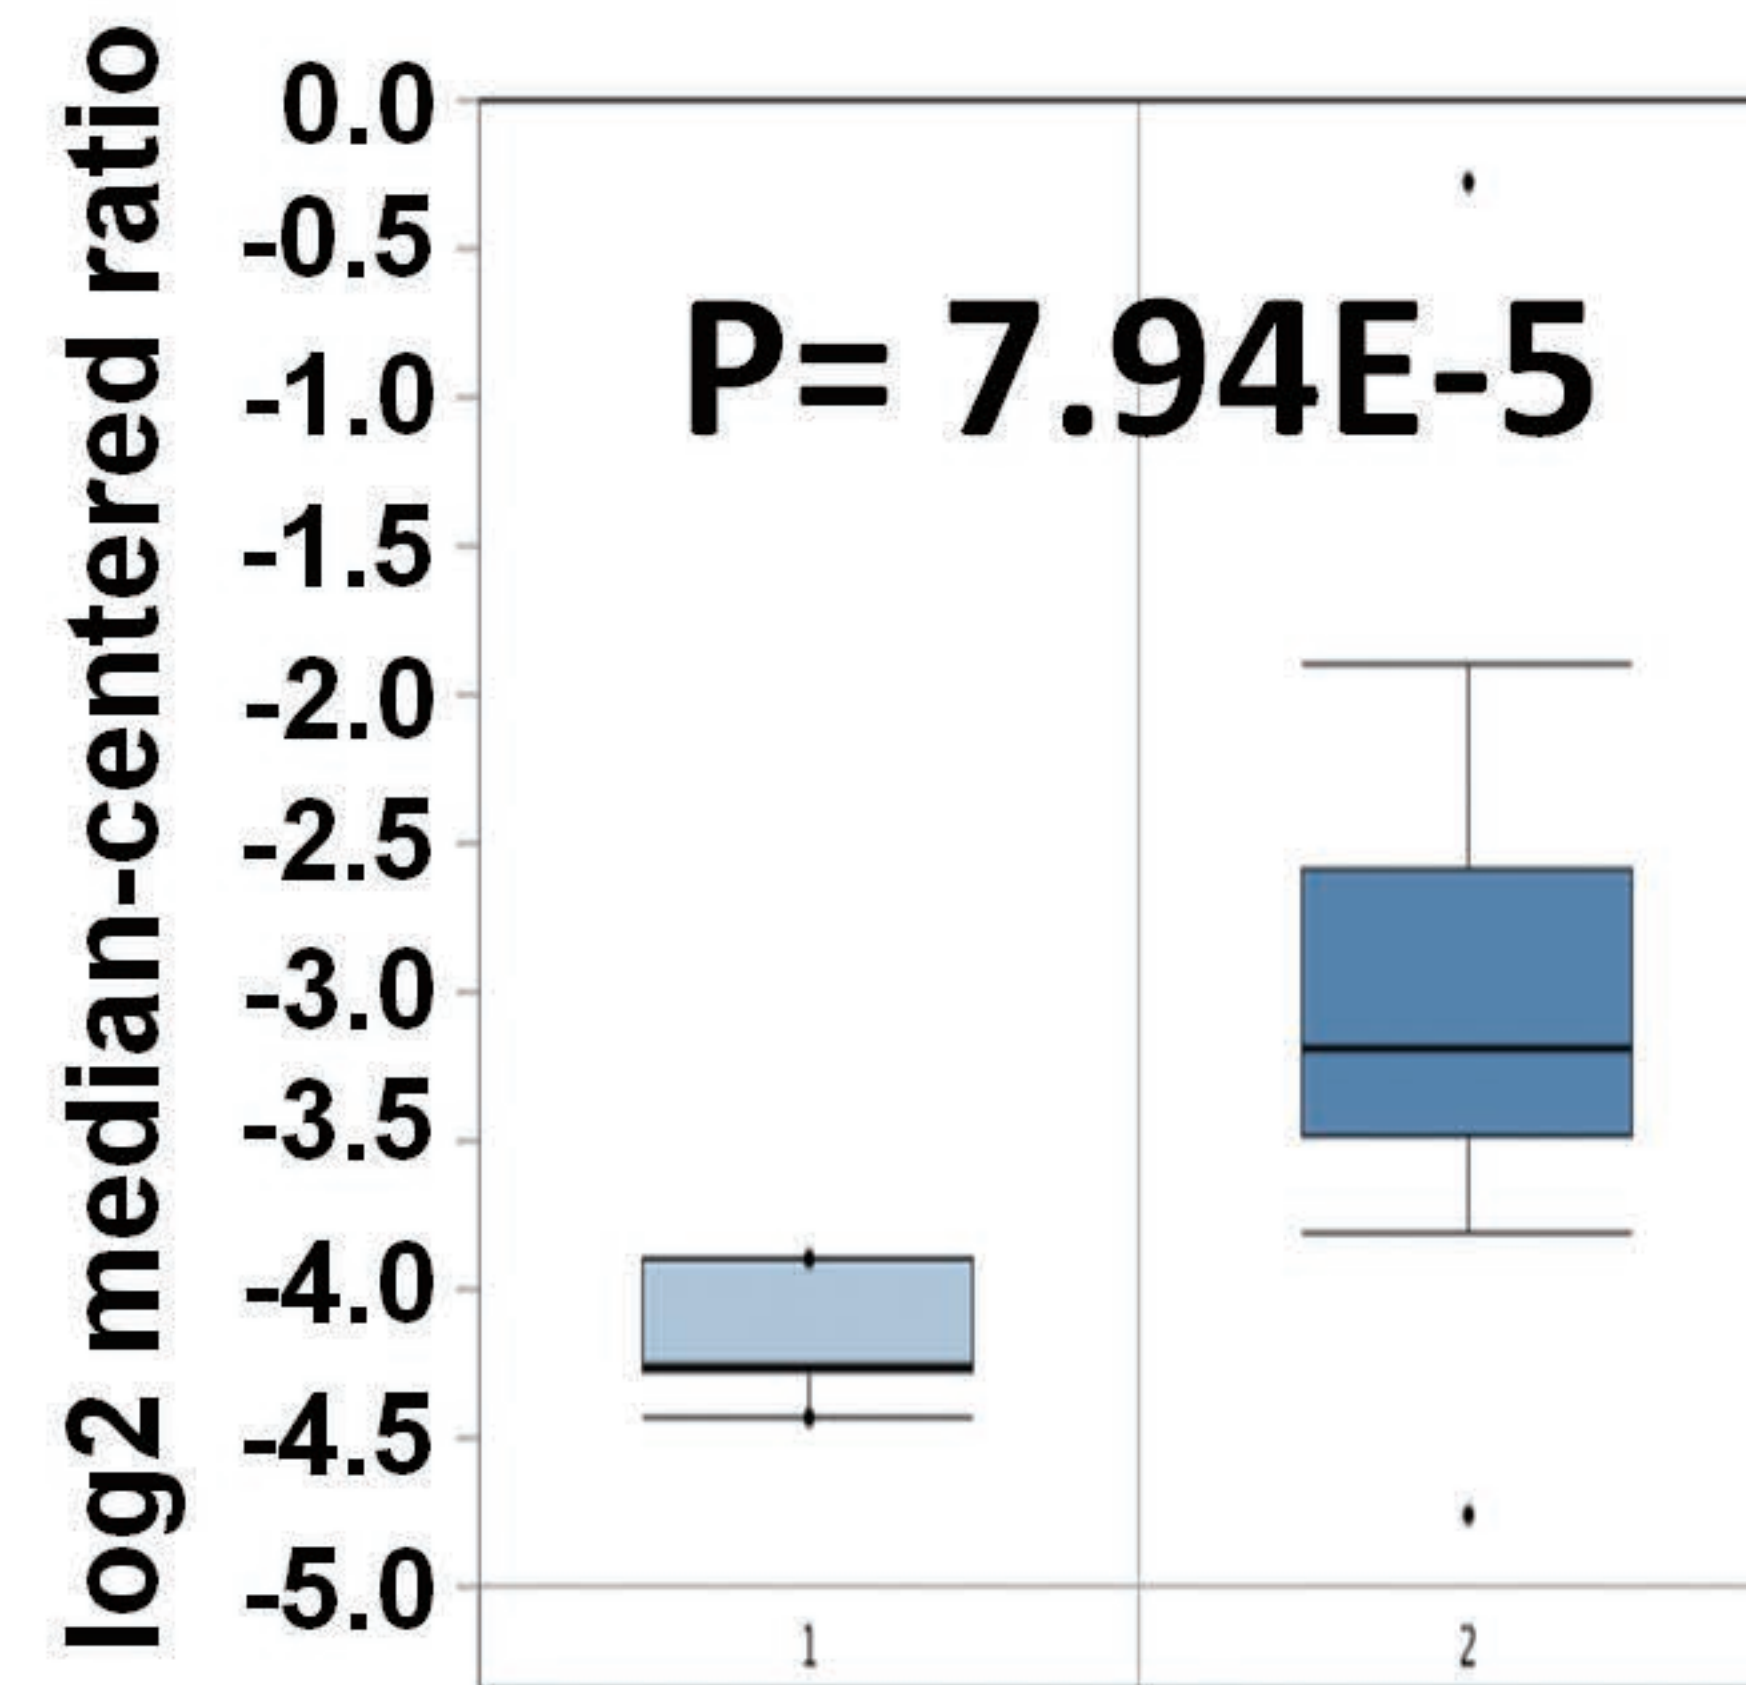

**USP44**

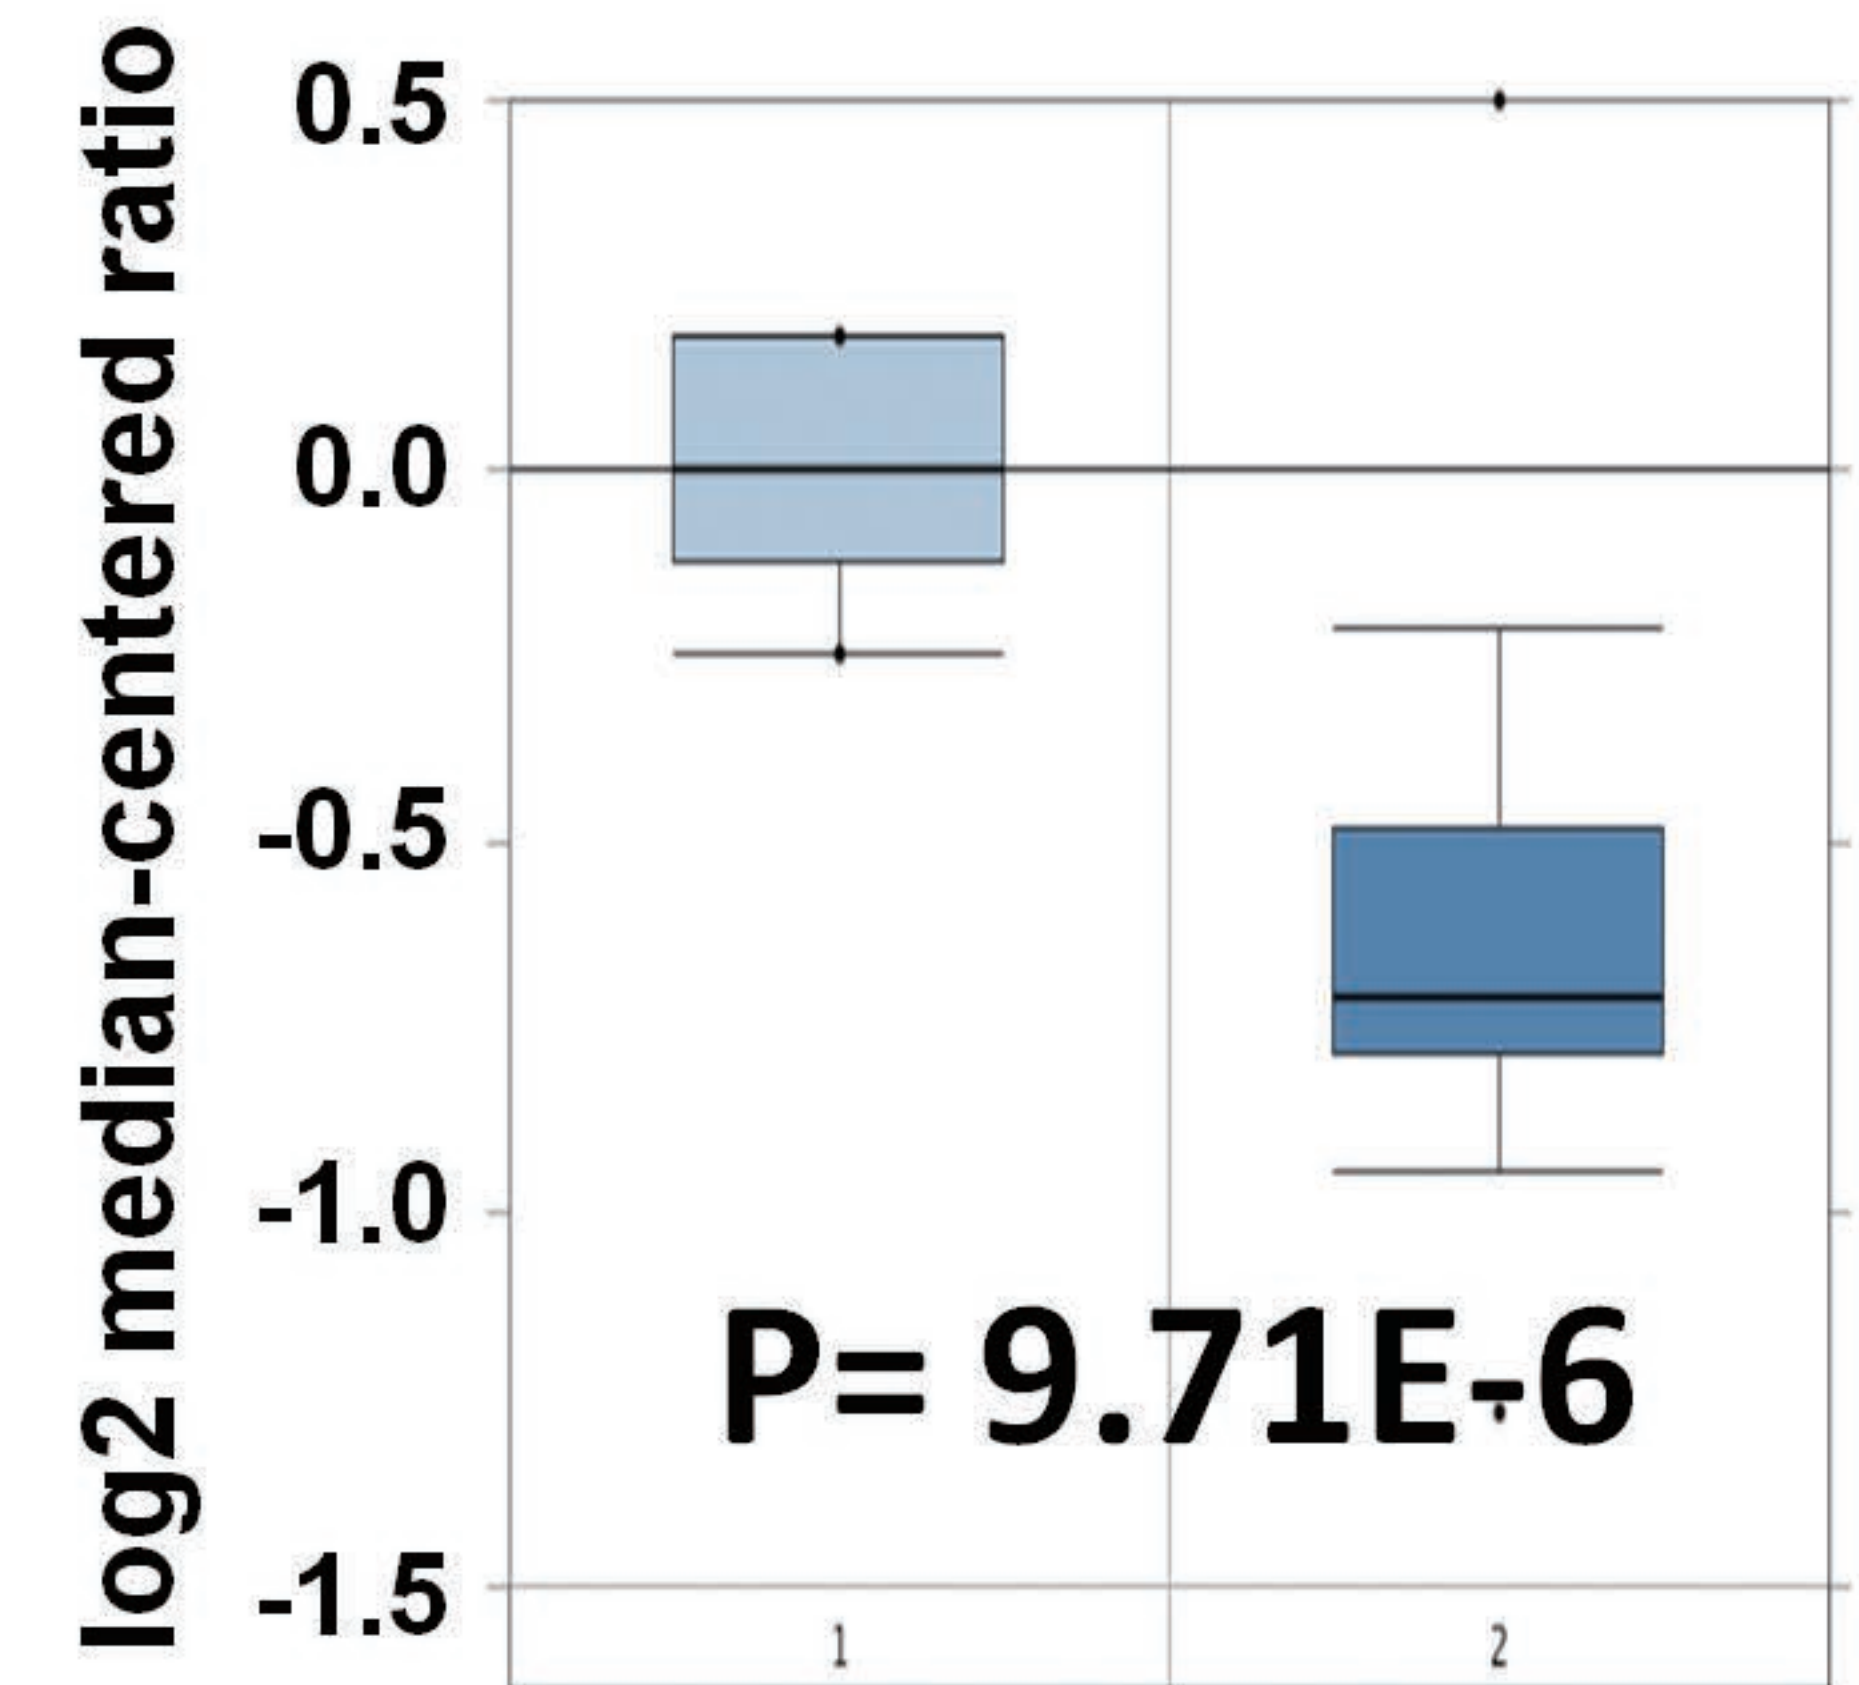

**Lung**  
Hou et al

Lung   
Lung Adenocarcinoma 

**P= 5.18E-5**

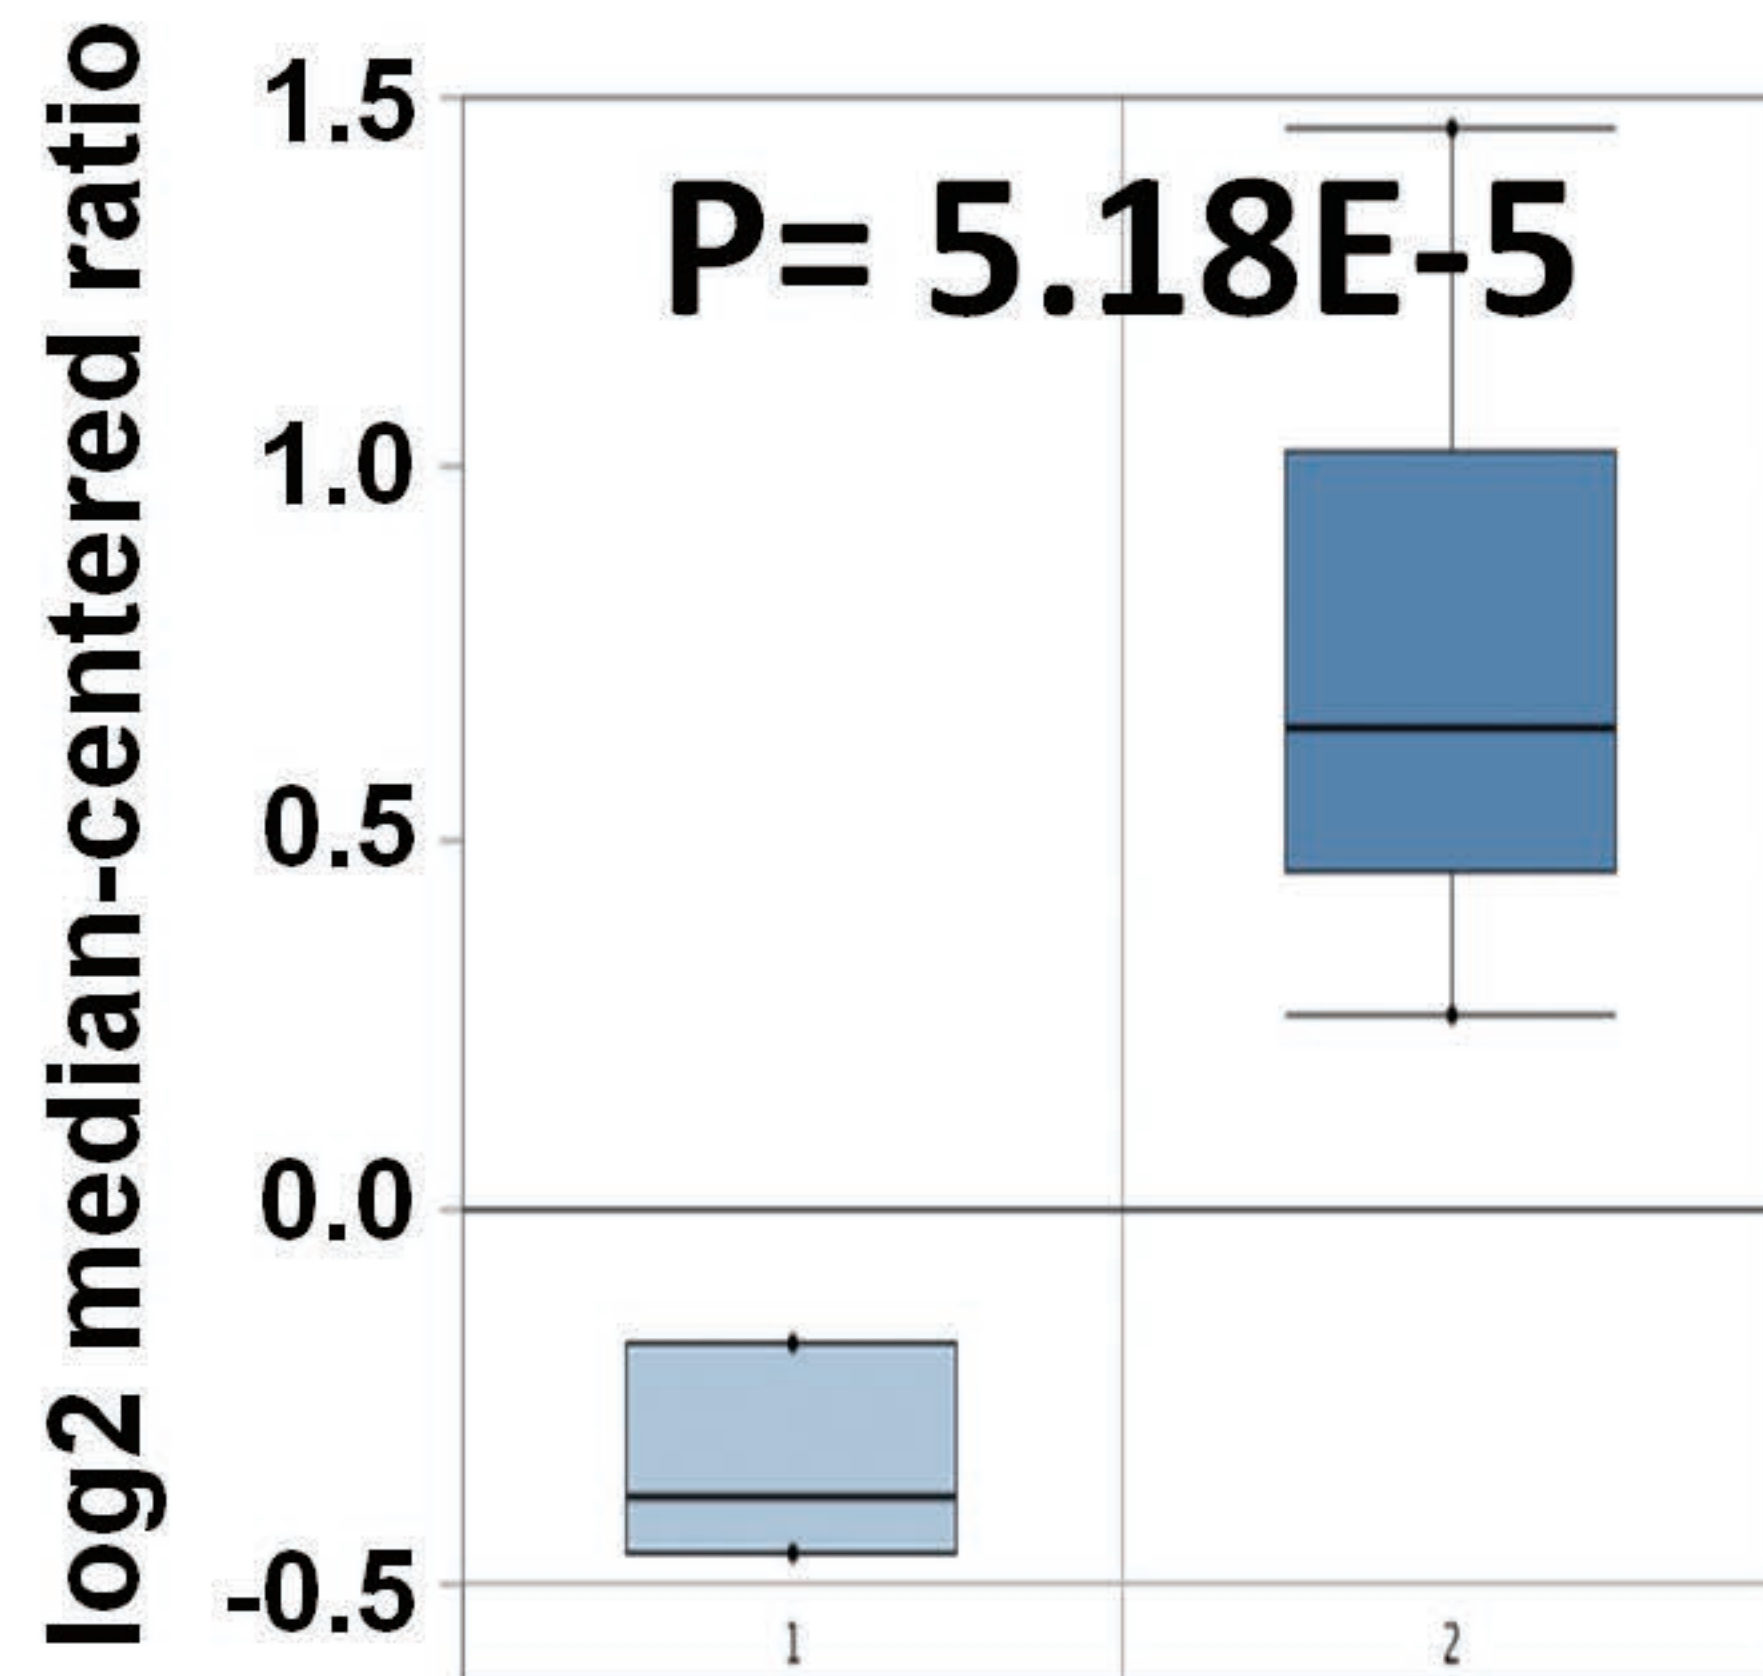

**P= 9.53E-8**

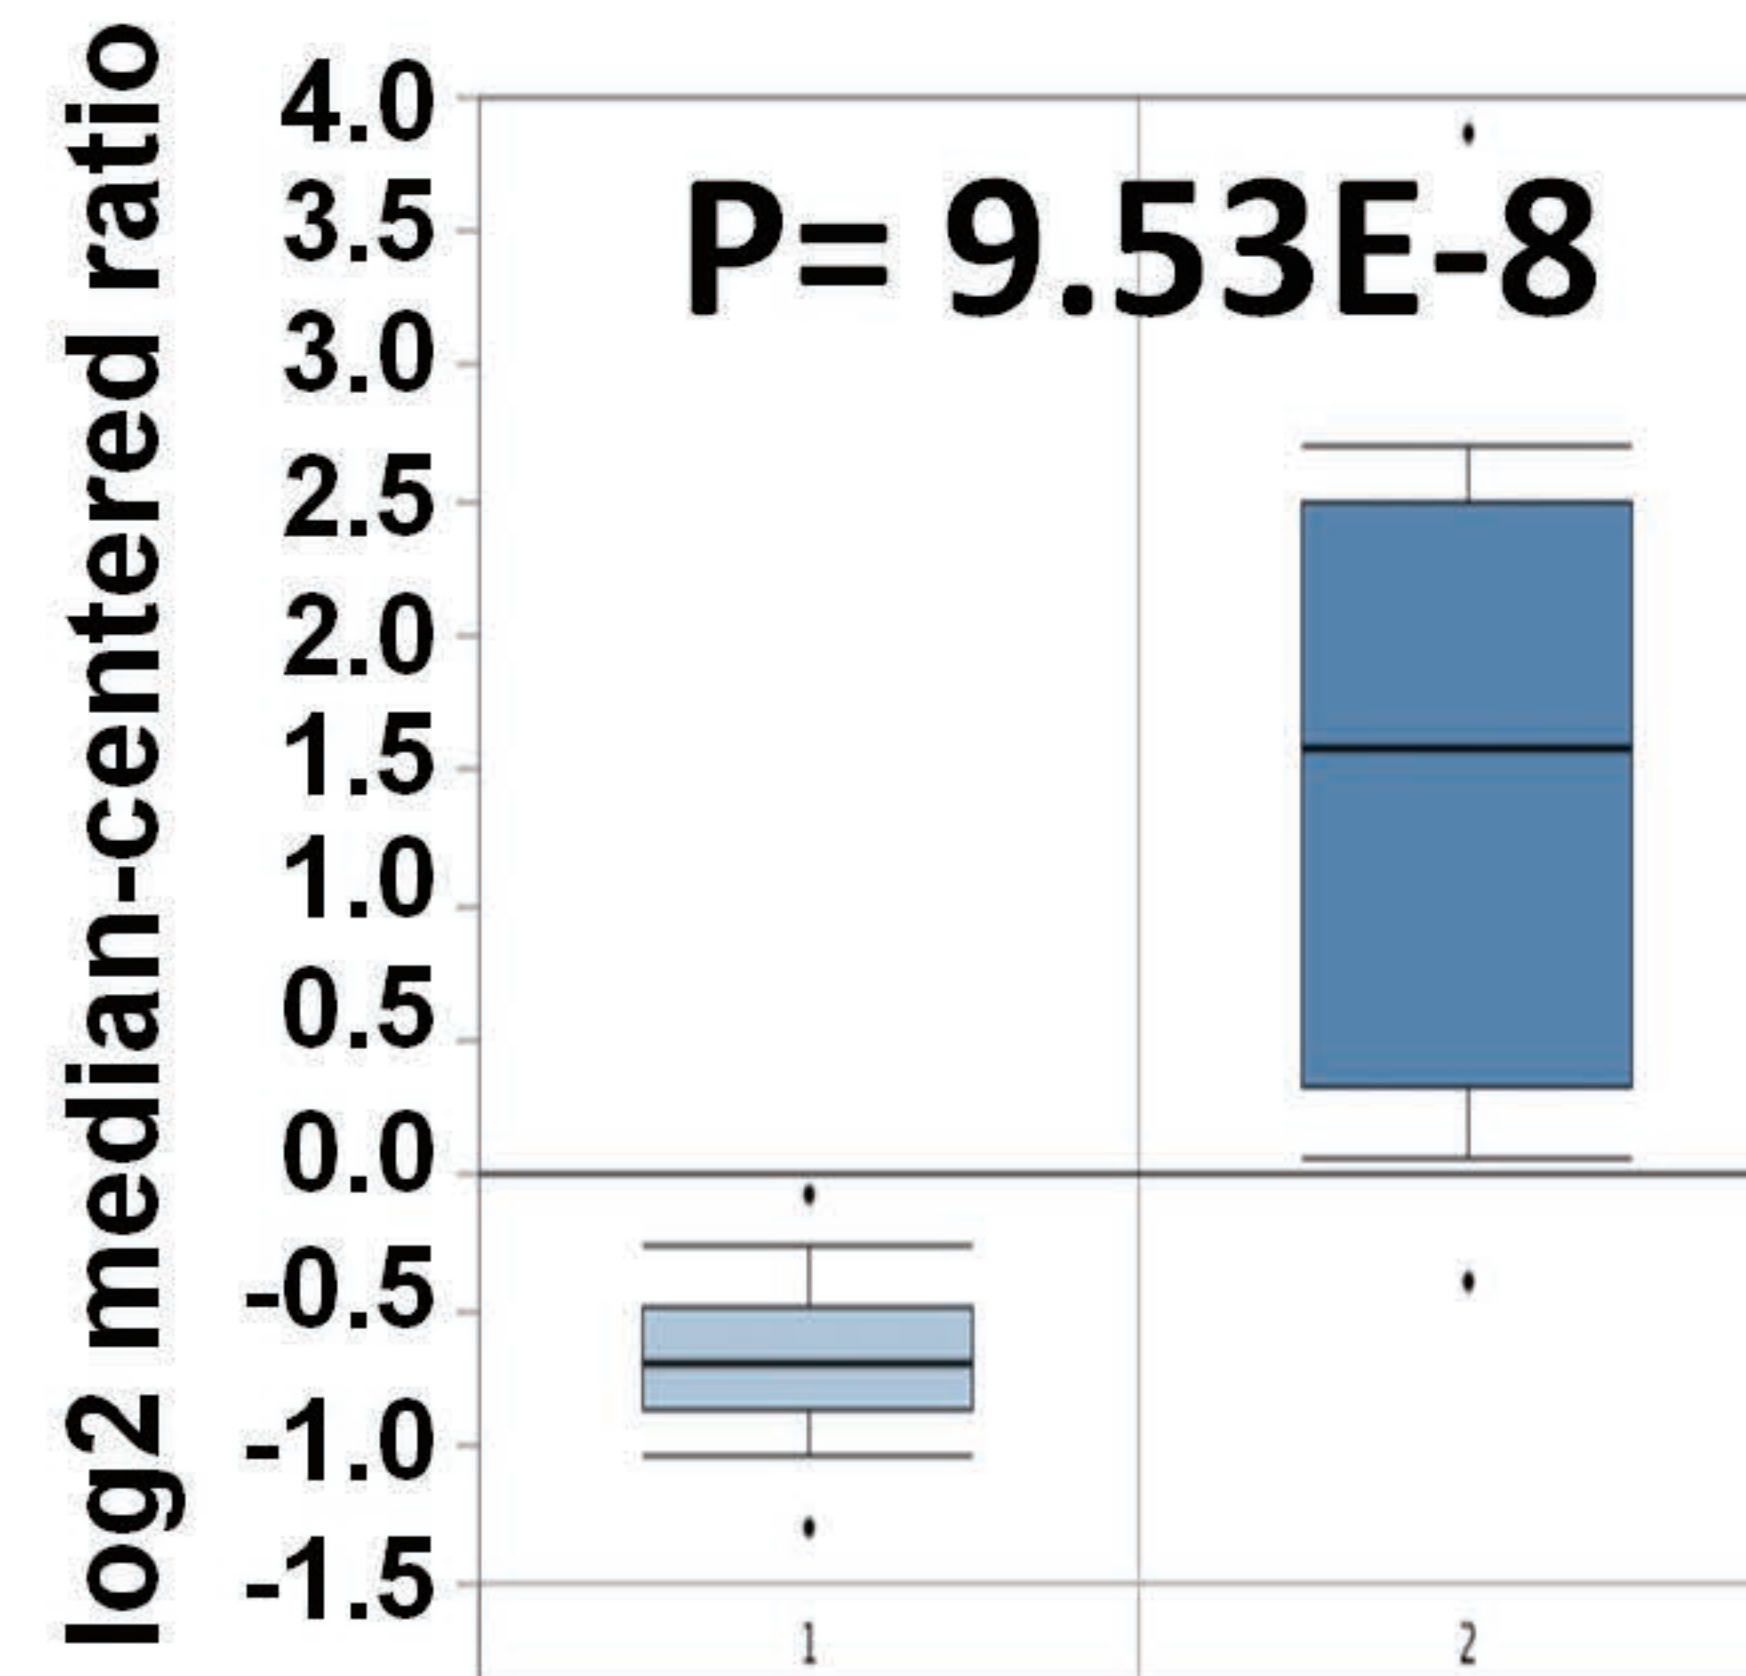

**P= 7.74E-15**

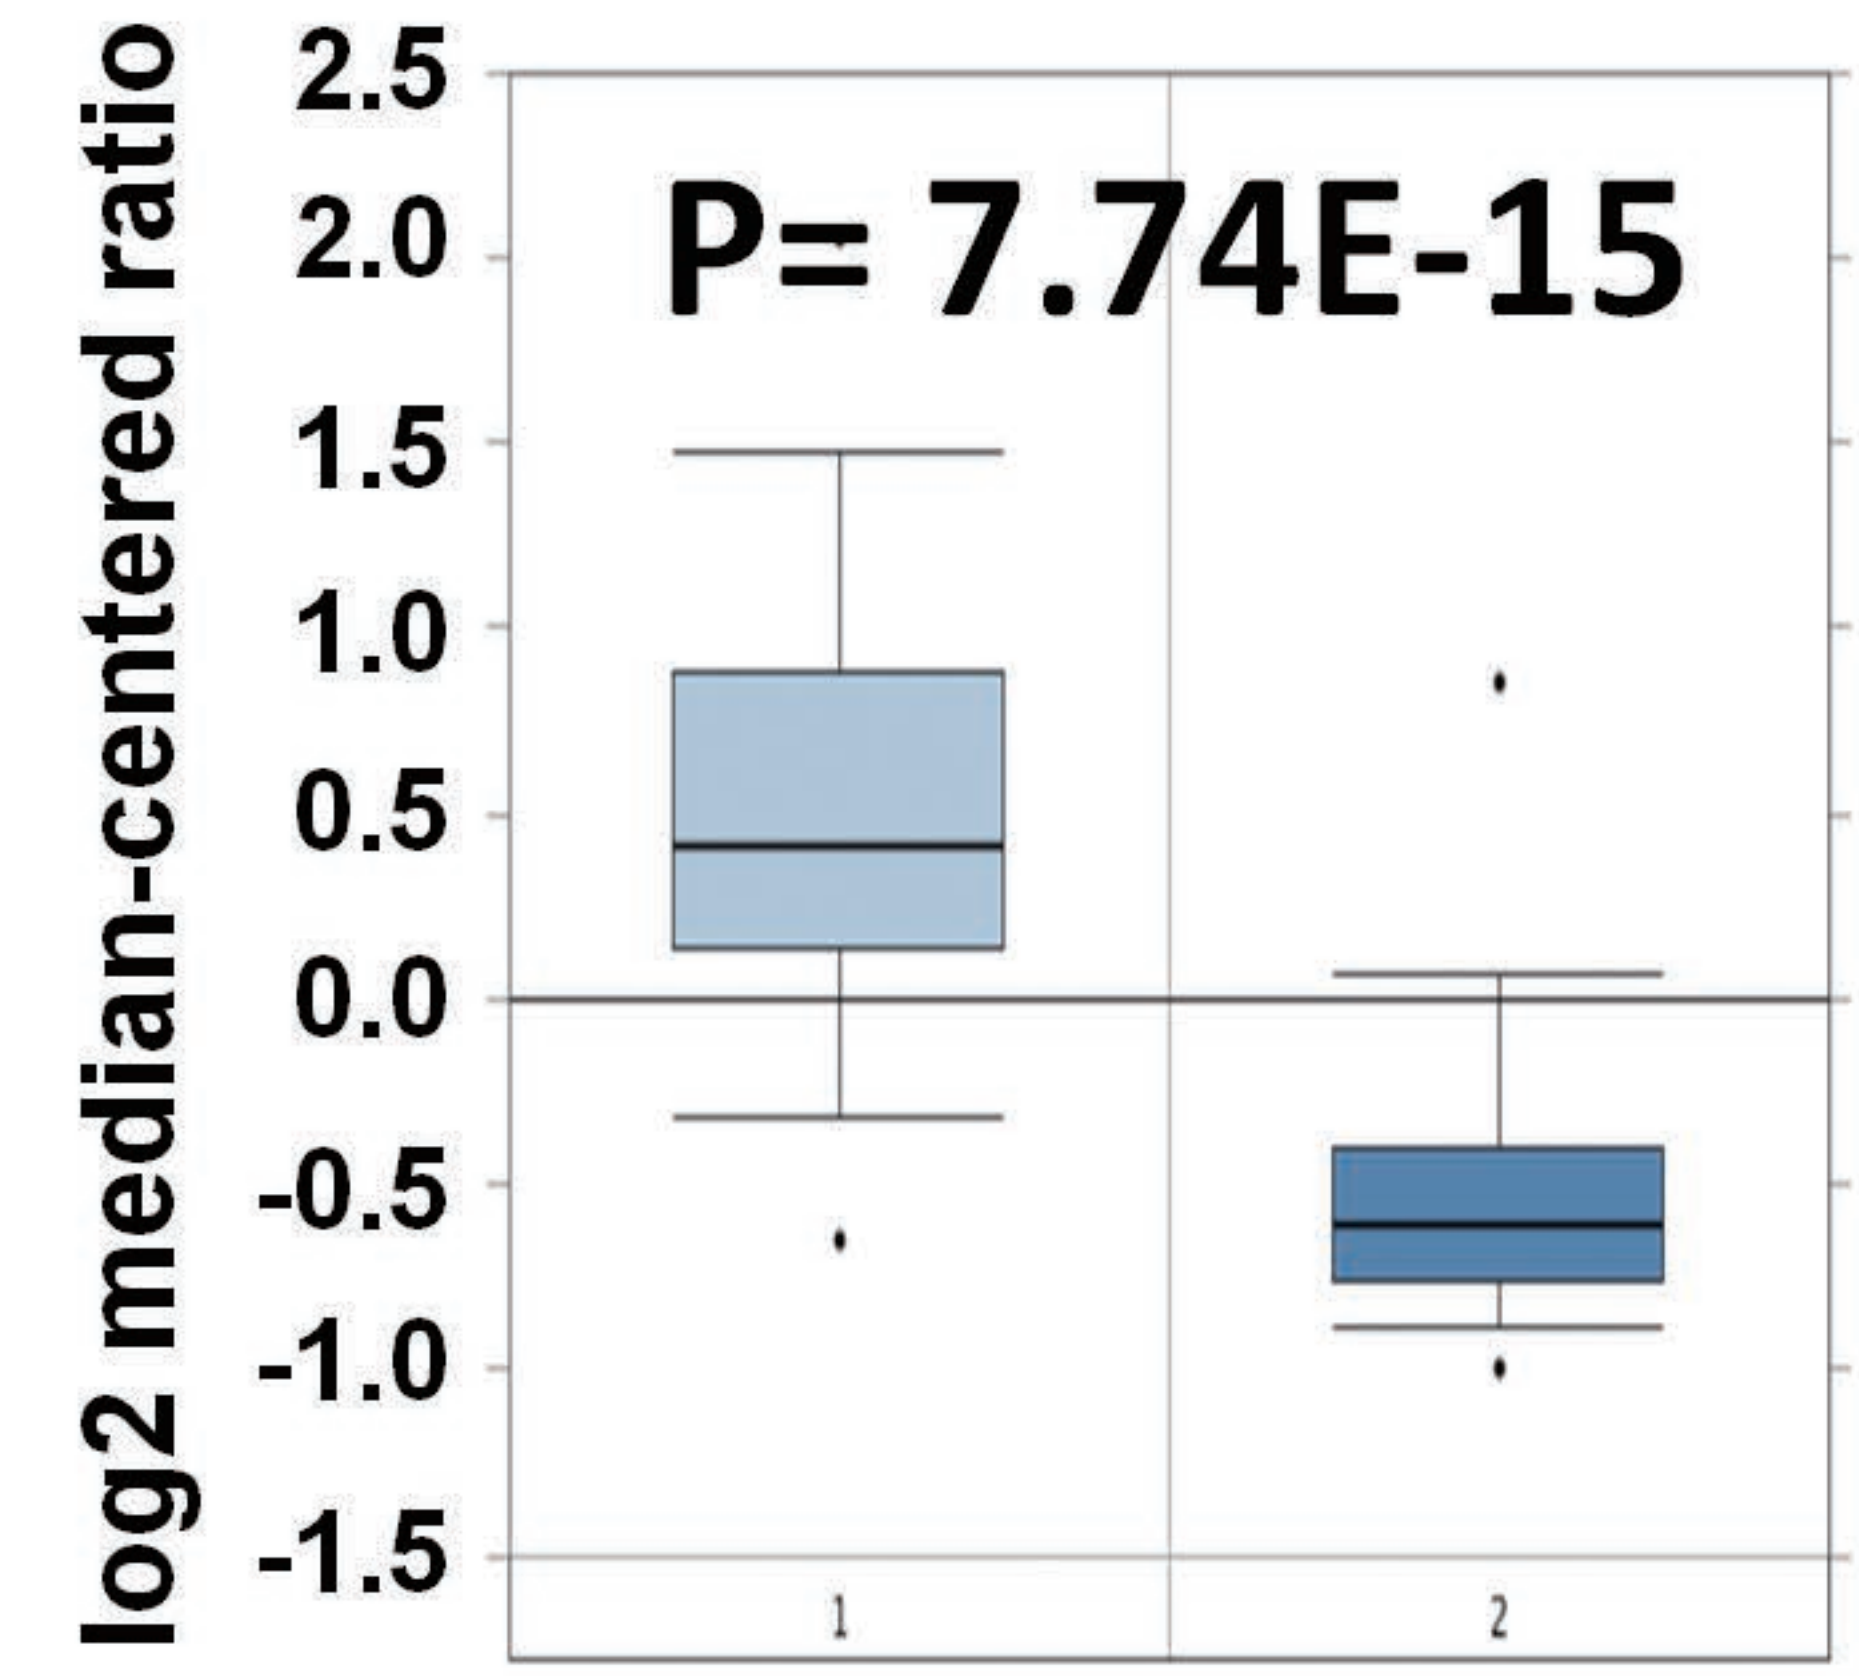

# Figure S5

## A

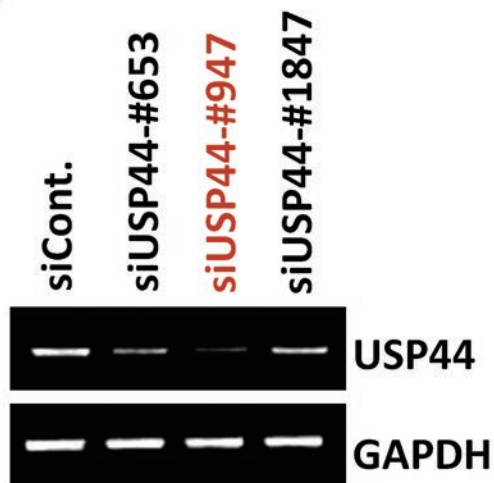

## B

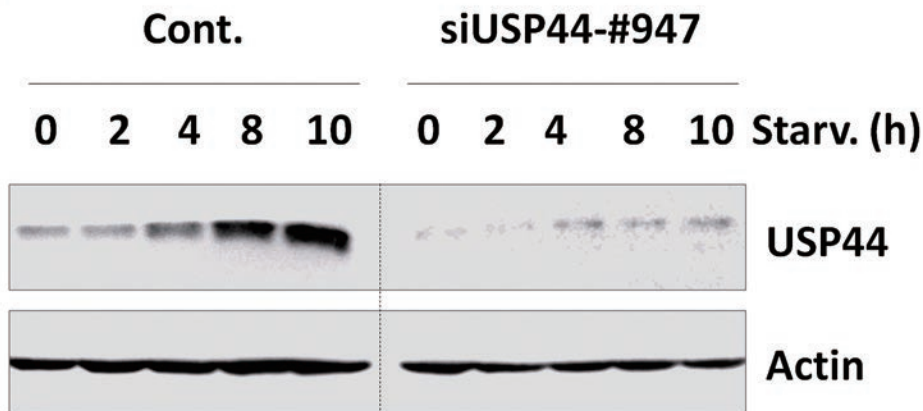

Supplement: gkw1025_Supp.pdf [file gkw1025_Supp.pdf]
